# Supplementary material for: Characterization of dengue cases among patients with an acute illness, Central Department, Paraguay
Source: PeerJ journal article supplement (doi:10.7717/peerj.7852), 2019-10-09

**Characterization of dengue cases among patients with an acute illness, Central  
Department, Paraguay**

Alejandra Rojas, Fátima Cardozo, César Cantero, Victoria Stittleburg, Sanny López,  
Cynthia Bernal, Francisco Giménez, Laura Mendoza, Benjamin A. Pinsky,  
Yvalena Guillén, Malvina Páez, Jesse J. Waggoner

## Supplemental Figures

**Figure S1.** DENV viral load in samples with detectable DENV NS1 antigen (●) or without detectable NS1 (▲). Bars display mean  $\pm$  95% CI. P values (t test): \*\*\*\* =  $p < 0.0001$

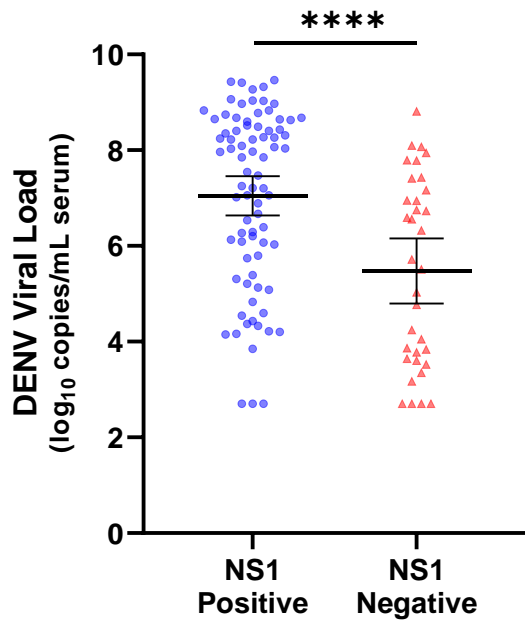

**Figure S2.** Distribution of DENV-positive and DENV-negative cases by epidemiologic week, 2018.

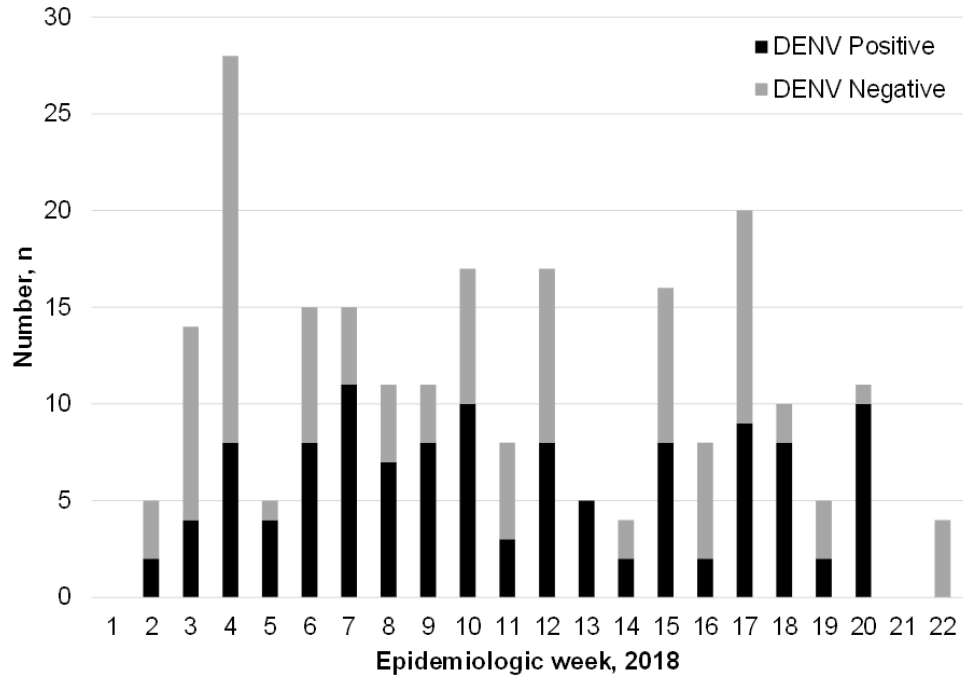

Supplement: 28Aug19_-_Dengue_in_Asuncion_-_Supplemental_Material.pdf [file 28Aug19_-_Dengue_in_Asuncion_-_Supplemental_Material.pdf]
