# Supplementary material for: Characterization of dengue cases among patients with an acute illness, Central Department, Paraguay
Source: PeerJ. 2019 Oct 9;7:e7852. doi: 10.7717/peerj.7852 (PMC6790102; doi:10.7717/peerj.7852)
Supplement: Raw data S1 [file peerj-07-7852-s001.xlsx]

## Sheet: Patients
Site	Code	NS1	IgG	IgM	PCR DENV	ZIKA IgG ELISA	Serotype DENV	ZCD	Department	Residence	Other Residence	Settlement	Empty Lot	Window Screens	AC	Running Water	Store Water	Tops on Water	Travel-Month	Out of Home	Open Air	YF Vaccine	Past dengue	Fever	Day of Fever	Day of Symptoms	Day of Illness	Fever measured	Peak Temp	Red Eyes	Date of Red Eyes	Rash	Date of Rash	Joint Pain	Muscle Pain	Headache	Malaise	Retroorb Pain	Cough	Shortness of Breath	Back Pain	Sore Throat	Abdominal Pain	Nausea	Vommitting	Diarrhea	Edema	Bleeding	Pruritis
H	1	Negative	Negative	Negative	Negative	Negative			Central	House		NA	NA	no	yes	yes	no		no	yes	NA	Unknown	no	yes	1	1	1	Tactile		no		no		no	yes
H	2	Negative	Negative	Negative	Negative	Positive			Central	House		NA	NA	no	no	yes	no		no	yes	NA	Unknown	no	yes	1	1	1	NA		no		yes	yes	yes	yes	1	0	0	1	0	0	0	1	0	1	0	1	0	0
H	3	Negative	Positive	Positive	Negative				Central	House		yes	NA	no	no	yes	no		yes	yes	NA	Unknown	no	no		3	3			no		yes	yes	no	yes	0	0	0	0	0	0	0	0	1	1	0	1	1	0
H	4	Positive	Positive	Positive	Positive	Negative	DENV-1	31.44	Central	House		NA	NA	no	yes	yes	no		no	yes	yes	Unknown	no	yes	7	7	7	yes	39	no		no		yes	yes	1	0	0	0	0	0	0	0	0	0	0	0	1	0
H	5	Positive	Negative	Negative	Positive	Negative	DENV-1	19.44	Central	House		NA	NA	no	yes	yes	no		no	no		Unknown	yes	yes	2	2	2	yes	41	yes	NA	no		yes	yes	1	0	0	0	0	0	0	1	0	0	0	0	0	0
H	6	Positive	Negative	Negative	Positive		DENV-1	17.59	Central	House		NA	yes	no	yes	yes	no		no	yes	NA	Unknown	no	yes	2	2	2	Tactile		no		no		yes	yes	1	0	0	0	0	0	0	0	1	0	0	0	0	0
H	7	Negative	Positive	Negative	Negative	Positive	-	39.62	Central	House		NA	NA	no	no	yes	no		no	no		Unknown	no	yes	2	2	2	Tactile		no		no		yes	yes	1	0	0	0	0	0	0	0	1	0	0	0	0	0
H	8	Positive	Negative	Negative	Positive	Negative	DENV-1	18.03	Central	House		NA	yes	no	no	yes	no		yes	yes	NA	Unknown	no	yes	2	2	2	Tactile		yes	NA	yes	NA	yes	yes	1	0	0	0	0	0	0	0	0	0	0	0	0	0
H	9	Negative	Negative	Negative	Negative		-	39.83	Central	House		NA	NA	no	yes	yes	no		no	yes	NA	yes	no	yes	2	2	2	yes	39	no		no		yes	yes	0	0	0	0	0	0	0	0	0	0	1	0	0	0
H	10	Negative	Negative	Negative	Negative				Central	House		NA	NA	no	no	yes	no		no	yes	NA	Unknown	no	yes	2	2	2	Tactile		no		no		yes	yes	1	0	0	0	0	0	0	1	1	0	0	0	0	0
H	11	Negative	Negative	Negative	Negative	Negative			Central	House		NA	NA	no	yes	yes	no		yes	yes	yes	Vaccinated	no	yes	5	5	5	yes	39	no		yes	yes	no	yes	1	0	0	0	0	1	0	0	0	1	0	0	0	0
H	12	Negative	Negative	Negative	Negative	Negative			Central	House		NA	NA	yes	yes	yes	no		yes	no		yes	yes	yes	2	2	2	yes	38.8	no		no		yes	yes	1	0	0	0	0	0	1	0	1	1	0	0	0	0
H	13	Negative	Negative	Negative	Negative	Positive			Central	House		NA	NA	no	yes	yes	no		no	yes	NA	no	yes	no		3	3			no		yes	yes	no	no	1	0	0	1	1	0	0	0	0	0	0	1	0	0
H	14	Negative	Positive	Negative	Negative	Positive			Central	House		NA	yes	no	yes	yes	no		yes	yes	NA	Unknown	no	yes	1	1	1	yes	38	no		no		no	yes	1	0	0	0	0	0	0	0	0	0	0	0	0	0
H	15	Negative	Positive	Negative	Positive	Positive	DENV-2	39.53	Central	House		NA	NA	no	no	yes	no		no	no		no	yes	no		2	2			no		no		yes	yes	1	0	0	1	1	0	1	1	1	0	0	0	0	0
H	16	Positive	Negative	Negative	Positive		DENV-1	18.32	Central	House		NA	NA	yes	no	yes	no		yes	yes	NA	Unknown	no	yes	2	2	2	Tactile		yes	NA	no		no	no	1	0	0	0	0	0	0	0	1	1	0	0	0	0
H	17	Negative	Negative	Negative	Negative	Positive			Central	House		NA	NA	yes	no	yes	no		yes	yes	NA	Vaccinated	yes	yes	4	4	4	Tactile		no		no		yes	yes	1	0	0	1	1	0	0	1	1	1	1	0	0	0
H	18	Negative	Negative	Negative	Negative	Positive			Central	House		NA	NA	no	yes	yes	no		yes	yes	NA	Vaccinated	yes	yes	2	2	2	yes	40	yes	NA	yes	NA	yes	yes	1	0	0	0	0	0	1	0	0	0	0	0	0	0
H	19	Negative	Negative	Negative	Negative	Positive			Central	House		NA	yes	no	no	yes	no		no	yes	NA	no	no	yes	1	1	1	Tactile		yes	NA	no		no	yes	1	0	0	0	0	0	0	0	1	1	0	0	0	0
H	20	Negative	Negative	Negative	Negative	Negative			Central	House		yes	NA	no	no	yes	no		yes	yes	NA	no	no	yes	4	4	4	Tactile		yes	NA	no		yes	yes	1	0	0	1	1	0	0	1	1	0	0	0	0	0
H	21	Negative	Negative	Negative	Positive	Negative	DENV-1	21.32	Central	House		NA	NA	no	no	yes	no		no	yes	NA	no	no	yes	2	2	2	Tactile		no		no		no	no	1	0	0	0	0	0	0	0	0	0	0	0	0	0
H	22	Negative	Positive	Negative	Positive	Positive	DENV-1	29.89	Central	House		yes	NA	no	yes	yes	no		no	yes	yes	Unknown	no	yes	6	6	6	yes	39	yes	NA	yes	NA	no	no	1	0	0	1	0	0	0	0	1	0	1	0	0	0
H	23	Positive	Negative	Negative	Positive	Negative	DENV-1	21.09	Central	House		NA	yes	no	no	yes	no		no	yes	NA	no	no	yes	3	3	3	yes	40	yes	NA	no		yes	yes	1	0	0	0	0	0	0	0	1	1	0	0	0	0
H	24	Negative	Negative	Negative	Negative	Negative			Central	House		NA	NA	no	yes	yes	no		no	yes	NA	Vaccinated	no	yes	2	2	2	Tactile		no		no		yes	yes	1	0	0	1	1	0	0	0	0	0	1	0	0	0
H	25	Negative	Positive	Negative	Negative	Negative			Central	House		NA	NA	no	yes	yes	no		NA	no		no	yes	yes	3	3	3	yes	41	no		no		NA	yes	1	0	0	0	0	0	0	0	0	0	0	0	0	0
H	26	Negative	Negative	Negative	Negative		-	39.5	Central	House		yes	NA	no	no	yes	no		no	yes	NA	Vaccinated	yes	yes	3	3	3	Tactile		no		no		no	yes	1	0	0	0	0	0	0	1	1	0	1	0	0	0
H	27	Negative	Positive	Negative	Negative	Positive			Central	House		NA	NA	yes	no	yes	no		no	yes	NA	Unknown	yes	yes	5	5	5	Tactile		yes	yes	no		no	yes	1	0	0	1	1	0	1	0	0	0	0	0	0	0
H	28	Negative	Negative	Negative	Negative	Positive			Central	House		NA	NA	no	no	yes	no		no	yes	NA	Unknown	no	yes	2	2	2	Tactile		no		yes	yes	no	no	0	0	0	0	0	0	0	0	0	0	0	1	0	1
H	29	Negative	Negative	Negative	Negative	Negative			Central	House		NA	NA	no	no	yes	no		no	no		yes	yes	yes	3	5	3	Tactile		no		no		yes	yes	1	0	0	1	1	0	1	0	1	0	1	0	1	0
H	30	Negative	Positive	Negative	Negative	Positive			Central	House		NA	NA	no	yes	yes	no		yes	yes	NA	Unknown	yes	yes	2	2	2	yes	39	no		no		yes	yes	1	0	0	0	0	0	0	1	0	0	1	0	0	0
H	31	Negative	Negative	Negative	Negative	Negative			Central	House		NA	NA	no	no	yes	no		yes	yes	NA	no	no	yes	2	2	2	Tactile		no		no		yes	yes	1	0	0	0	0	0	0	0	0	1	0	1	0	0
H	32	Negative	Negative	Negative	Negative	Negative			Central	House		NA	NA	no	yes	yes	no		NA	yes	NA	Unknown	Possible	yes	3	3	3	yes	38	yes	NA	no		yes	yes	1	0	0	0	1	0	0	1	1	0	0	0	0	0
H	33	Negative	Positive	Negative	Negative	Indeterminate			Central	Other	NA	NA	NA	no	no	yes	no		yes	yes	NA	yes	no	yes	4	4	4	yes	38	no		no		yes	yes	1	0	0	0	0	0	0	1	0	0	0	0	0	0
H	34	Negative	Negative	Negative	Negative	Negative			Central	House		NA	NA	yes	yes	yes	no		yes	yes	yes	Vaccinated	no	yes	4	4	4	Tactile		yes	yes	no		yes	yes	1	0	1	0	1	0	0	1	1	0	0	0	0	0
H	35	Positive	Negative	Negative	Positive		DENV-1	20.43	Central	House		NA	NA	no	no	yes	no		no	yes	NA	Unknown	yes	yes	1	1	1	yes	39	no		no		yes	yes	1	0	0	0	0	0	1	0	0	0	0	0	0	0
H	36	Negative	Negative	Negative	Negative	Negative			Central	House		NA	NA	no	yes	yes	no		yes	yes	NA	yes	no	yes	2	2	2	Tactile		no		no		no	no	1	0	0	0	0	0	0	0	1	0	0	0	0	0
H	37	Negative	Positive	Negative	Positive	Positive	DENV-1	35.9	Central	House		NA	NA	no	no	yes	no		no	no		Vaccinated	yes	yes	2	2	2	yes	40	yes	yes	no		yes	no	1	0	0	0	0	0	0	0	0	0	0	0	0	0
H	38	Negative	Negative	Negative	Negative	Negative			Central	Apartment		NA	NA	no	yes	yes	no		no	yes	NA	Unknown	no	yes	1	1	1	Tactile		no		no		yes	yes	1	0	0	0	0	0	0	1	1	1	1	0	0	0
H	39	Positive	Negative	Negative	Positive	Negative	DENV-1	26.08	Central	House		NA	NA	no	no	yes	yes	NA	yes	no		yes	no	yes	4	4	4	Tactile		no		no		yes	yes	1	0	0	1	1	0	0	0	1	1	0	0	1	0
H	40	Positive	Negative	Negative	Positive	Negative	DENV-1	19	Central	House		NA	NA	no	no	yes	no		no	yes	NA	Unknown	no	yes	2	2	2	yes	38.5	yes	NA	no		no	yes	1	0	0	0	0	0	0	0	0	0	0	0	0	0
H	41	Positive	Negative	Negative	Negative		-	39.54	Central	House		NA	NA	no	yes	yes	no		no	no		yes	yes	no		2	2			no		yes	NA	no	yes	0	1	0	0	0	0	1	0	1	0	0	0	0	0
H	42	Negative	Negative	Negative	Negative				Central	House		NA	NA	no	no	yes	no		no	yes	NA	Unknown	no	yes	3	3	3	Tactile		NA		yes	NA	yes	yes	1	0	0	0	1	0	1	0	0	0	0	1	0	0
H	43	Negative	Negative	Negative	Negative	Negative			Central	House		NA	NA	no	no	yes	no		yes	yes	NA	Unknown	no	yes	4	4	4	Tactile		no		yes	NA	no	no	1	0	0	0	0	0	0	0	0	0	0	1	0	0
H	44	Negative	Negative	Negative	Negative				Central	House		NA	NA	no	yes	yes	no		no	yes	NA	no	no	yes	3	3	3	Tactile		no		no		no	yes	1	0	0	1	0	0	1	0	0	0	1	0	0	0
H	45	Negative	Positive	Negative	Negative	Positive			Central	House		NA	NA	no	yes	yes	no		yes	yes	NA	yes	yes	yes	2	2	2	Tactile		no		no		yes	yes	1	0	0	0	0	0	0	1	0	0	0	0	0	0
H	46	Negative	Negative	Negative	Negative	Negative			Central	House		NA	NA	no	no	yes	no		no	yes	NA	Unknown	yes	yes	5	7	5	Tactile		no		yes	NA	yes	yes	0	0	0	1	1	0	1	1	0	0	1	0	0	0
H	47	Negative	Negative	Negative	Positive	Positive	DENV-1	24.26	Central	House		NA	NA	no	yes	yes	no		yes	yes	NA	Unknown	no	yes	2	2	2	yes	38	yes	NA	no		yes	no	1	0	0	0	0	0	0	0	0	0	0	0	0	0
H	48	Positive	Negative	Negative	Positive		DENV-1	20.61	Central	House		NA	NA	no	no	yes	no		no	NA		no	no	yes	2	2	2	yes	40	yes	NA	no		no	yes	1	0	0	0	0	0	0	0	0	0	0	0	0	0
H	49	Positive	Positive	Positive	Positive		DENV-1	33.08	Central	House		NA	NA	no	no	yes	no		yes	yes	NA	yes	no	yes	5	5	5	yes	40	yes	NA	no		no	yes	0	0	0	0	1	0	0	1	1	1	0	0	0	0
H	50	Positive	Negative	Positive	Positive	Negative	DENV-1	38.56	Central	House		NA	NA	yes	yes	yes	no		NA	yes	NA	Unknown	no	yes	7	7	7	yes	40	yes	NA	no		yes	yes	1	0	0	0	0	0	0	0	1	0	1	1	0	0
H	51	Positive	Negative	Negative	Positive		DENV-1	28.46	Central	House		NA	NA	no	yes	yes	no		no	no		Unknown	no	yes	5	5	5	yes	38	no		yes	NA	yes	yes	1	0	0	0	0	0	0	0	0	0	0	0	1	0
H	52	Negative	Negative	Negative	Negative	Positive			Central	House		NA	NA	yes	yes	yes	no		no	yes	NA	yes	no	yes	3	3	3	yes	39.5	no		no		yes	yes	1	0	0	0	0	0	0	0	0	0	0	0	0	0
H	53	Negative	Negative	Negative	Positive	Positive	DENV-1	34.59	Central	House		NA	NA	no	yes	yes	no		yes	yes	NA	no	yes	yes	2	2	2	Tactile		no		no		yes	yes	1	0	0	0	0	0	0	0	0	0	0	1	0	0
H	54	Positive	Negative	Negative	Positive	Indeterminate	DENV-1	24.56	Central	House		NA	NA	no	yes	yes	no		no	yes	NA	yes	no	yes	2	2	2	yes	39.5	no		no		yes	yes	1	0	0	0	0	0	0	1	1	0	0	0	0	0
H	55	Positive	Positive	Positive	Positive	Negative	DENV-1	29.98	Central	House		NA	NA	no	yes	yes	no		no	no		Vaccinated	yes	yes	5	5	5	yes	40	yes	NA	yes	yes	yes	yes	1	0	0	0	0	0	1	1	1	1	1	1	0	0
H	56	Positive	Negative	Negative	Positive	Negative	DENV-1	29.1	Central	House		NA	NA	yes	NA	yes	no		yes	yes	NA	Unknown	yes	yes	3	3	3	yes	38.6	NA		no		yes	yes	1	0	0	0	0	0	0	1	0	0	0	0	0	0
H	57	Negative	Positive	Negative	Negative	Positive	-	38.92	Central	House		NA	NA	no	yes	yes	no		yes	yes	NA	yes	yes	yes	2	2	2	Tactile		no		no		yes	yes	0	0	0	0	0	0	0	1	1	0	1	0	0	0
H	58	Negative	Negative	Negative	Negative		-	39.65	Central	House		NA	NA	no	yes	yes	no		no	NA		NA	Possible	yes	2	2	2	yes	39	NA		no		yes	yes	1	0	0	0	1	0	0	1	1	1	1	0	1	0
H	59	Negative	Positive	Negative	Negative	Positive			Central	House		no	NA	NA	yes	yes	no		no	yes	NA	Unknown	no	yes	2	4	2	yes	39	no		no		yes	yes	1	0	0	0	1	0	0	1	1	1	0	0	0	0
H	60	Negative	Negative	Negative	Positive		DENV-1	25.8	Central	House		NA	NA	yes	yes	yes	no		no	no		Unknown	no	yes	2	2	2	yes	38	NA		no		yes	yes	1	0	0	0	0	0	0	1	0	0	0	0	0	0
H	61	Negative	Negative	Negative	Negative				Central	Other	NA	NA	NA	no	yes	yes	no		yes	yes	NA	Unknown	yes	yes	2	2	2	Tactile		no		no		yes	yes	1	0	0	0	0	0	1	1	1	0	0	0	0	0
H	62	Negative	Negative	Negative	Negative				Central	House		NA	NA	no	yes	yes	NA		no	yes	NA	Unknown	no	yes	4	4	4	yes	39	no		no		yes	yes	1	0	0	1	0	0	0	0	1	0	1	0	0	0
H	63	Negative	Negative	Negative	Positive	Negative	DENV-1	24.84	Central	House		NA	NA	no	no	yes	no		yes	no		Unknown	yes	yes	2	3	2	Tactile		no		no		yes	yes	1	0	0	0	1	0	0	1	0	0	0	0	0	0
H	64	Negative	Positive	Negative	Positive	Positive	DENV-1	38.21	Central	Other	NA	NA	NA	no	yes	yes	no		no	no		Unknown	no	yes	5	5	5	yes	38.5	no		no		yes	yes	1	0	0	1	1	0	0	0	1	0	1	0	0	0
H	65	Positive	Negative	Negative	Positive	Negative	DENV-1	18.54	Capital	Other	NA	NA	NA	NA	no	yes	no		NA	NA		Unknown	no	yes	5	5	5	yes	38.9	no		no		yes	yes	1	0	0	0	0	0	0	0	1	0	0	0	0	0
H	66	Positive	Negative	Negative	Positive		DENV-1	18.02	Central	House		NA	NA	no	no	yes	no		no	yes	NA	yes	no	yes	3	3	3	yes	38.5	NA		no		yes	yes	1	0	0	0	0	0	0	1	1	0	0	0	1	0
H	67	Positive	Negative	Negative	Positive	Negative	DENV-1	19.59	Central	House		NA	NA	no	yes	yes	no		no	no		yes	no	yes	3	3	3	yes	39	no		no		yes	yes	1	0	0	0	1	0	0	1	1	0	0	0	0	0
H	68	Positive	Negative	Negative	Positive	Negative	DENV-1	16.2	Central	House		NA	NA	NA	NA	NA	NA		NA	yes	NA	no	no	yes	2	2	2	yes	39.3	no		yes	NA	yes	yes	1	0	0	0	0	0	0	0	0	0	0	0	0	0
H	69	Negative	Negative	Negative	Positive	Negative	DENV-1	24.51	Central	Other	NA	NA	NA	no	yes	yes	no		no	yes	NA	Unknown	no	yes	3	3	3	yes	38.5	no		no		yes	yes	1	0	0	0	0	0	0	0	0	0	0	0	0	0
H	70	Negative	Positive	Positive	Positive	Positive	DENV-1	33.12	Central	Other	NA	NA	NA	no	yes	yes	no		no	yes	NA	yes	yes	yes	5	6	5	yes	40	no		no		yes	yes	0	0	0	0	1	0	1	1	1	1	0	1	1	0
H	71	Negative	Positive	Positive	Positive	Positive	DENV-1	39.01	Central	Other	NA	NA	NA	no	yes	yes	no		no	yes	NA	Unknown	no	yes	7	7	7	yes	40	no		yes	NA	yes	yes	1	0	0	0	0	0	0	0	1	1	1	0	1	0
H	72	Positive	Negative	Negative	Positive	Negative	DENV-1	16.52	Central	Other	NA	NA	NA	no	no	yes	no		no	yes	NA	yes	no	yes	2	2	2	yes	38.5	no		no		yes	yes	1	0	0	0	1	0	0	0	0	0	0	0	0	0
H	73	Negative	Negative	Negative	Positive	Negative	DENV-1	20.31	Central	Other	NA	NA	NA	NA	NA	NA	NA		yes	yes	NA	Unknown	no	yes	3	3	3	yes	38	no		no		yes	yes	1	0	0	0	1	0	0	0	1	0	0	0	0	0
H	74	Negative	Positive	Positive	Positive	Negative	DENV-1	37.06	Central	Other	NA	NA	NA	no	yes	yes	no		no	NA		Unknown	no	yes	8	8	8	yes	38	no		yes	NA	yes	yes	1	0	0	0	1	1	0	1	0	0	1	1	0	0
H	75	Positive	Positive	Positive	Positive	Negative	DENV-1	28.78	Central	Other	NA	NA	NA	no	no	yes	no		no	yes	NA	yes	no	yes	5	5	5	yes	38.7	NA		yes	NA	yes	yes	1	0	0	1	1	0	0	0	0	0	0	1	0	0
H	76	Negative	Negative	Negative	Positive		DENV-1	28.51	Capital	NA		NA	NA	NA	NA	NA	NA		NA	NA		yes	yes	yes	2	3	2	yes	39	no		no		yes	yes	1	0	0	1	0	0	0	0	1	0	0	0	0	0
H	77	Negative	Negative	Negative	Negative	Negative			Central	Other	NA	NA	NA	NA	NA	yes	no		NA	yes	NA	Unknown	no	yes	2	2	2	yes	38	no		no		yes	yes	1	0	0	0	0	0	0	0	1	0	0	0	0	0
H	78	Positive	Negative	Negative	Positive	Negative	DENV-1	18.73	Central	Other	NA	NA	NA	NA	NA	NA	NA		NA	NA		Unknown	no	yes	2	2	2	yes	38.5	no		no		yes	yes	1	0	0	0	0	0	0	1	1	1	0	0	0	0
H	79	Negative	Negative	Negative	Negative				Central	Other	NA	NA	NA	NA	NA	NA	NA		NA	NA		NA	no	yes	2	2	2	yes	38	no		no		yes	yes	1	0	0	0	0	0	1	0	1	0	0	0	0	0
H	80	Positive	Negative	Negative	Positive		DENV-1	25.2	Central	Other	NA	NA	NA	no	NA	NA	no		yes	no		yes	no	yes	2	2	2	yes	39	no		no		no	no	1	0	0	0	0	0	0	0	0	0	0	0	0	0
H	81	Negative	Negative	Negative	Negative				Central	Other	NA	NA	NA	no	yes	yes	no		no	no		Unknown	no	yes	2	2	2	yes	37.7	no		no		yes	yes	1	0	0	0	0	0	0	0	0	0	0	0	0	0
H	82	Positive	Positive	Negative	Positive	Negative	DENV-1	22.54	NA	Other	NA	NA	NA	NA	NA	NA	NA		NA	NA		NA	Possible	NA		NA	NA	NA		NA		yes		yes	yes	0	1	0	0	1	0	0	1	1	1	0	0	1	0
H	83	Positive	Negative	Negative	Positive	Negative	DENV-1	24.06	Central	NA		NA	NA	NA	NA	NA	NA		NA	NA		Unknown	no	yes	5	5	5	yes	39	no		no		yes	yes	1	0	0	0	0	0	0	1	1	1	1	1	0	0
H	84	Positive	Positive	Positive	Positive	Negative	DENV-1	34.65	Central	House		NA	NA	no	yes	yes	no		no	no		NA	yes	yes	6	7	6	yes	41.2	yes	NA	yes	NA	yes	yes	1	0	0	0	1	0	1	1	1	1	1	1	1	0
H	85	Negative	Positive	Negative	Positive	Positive	DENV-1	37.36	Central	NA		NA	NA	no	yes	yes	no		no	yes	NA	yes	no	yes	8	8	8	yes	38	no		yes	NA	no	no	1	0	0	0	0	0	0	0	1	0	0	0	0	0
H	86	Positive	Negative	Negative	Positive	Negative	DENV-1	21.19	Central	NA		NA	NA	NA	NA	NA	NA		yes	yes	NA	yes	no	yes	2	2	2	Tactile		no		no		yes	yes	1	0	0	0	0	0	1	0	1	0	0	0	0	0
H	87	Positive	Positive	Negative	Negative				Central	House		NA	NA	no	NA	yes	no		yes	yes	NA	Unknown	no	yes	2	2	2	yes	38	no		no		yes	yes	1	0	0	0	0	0	0	0	1	0	0	0	0	0
H	88	Positive	Negative	Negative	Positive		DENV-1	20.15	Central	House		NA	NA	no	yes	yes	no		no	yes	NA	Vaccinated	no	yes	1	5	1	yes	38	no		no		yes	yes	1	0	0	0	1	0	0	1	0	0	0	0	0	0
H	89	Positive	Negative	Negative	Positive	Negative	DENV-1	21.63	Central	House		no	yes	no	yes	yes	no		yes	yes	NA	Unknown	Possible	yes	5	5	5	Tactile		yes	yes	NA		yes	yes	1	1	1	0	0	0	0	0	1	0	0	0	0	0
H	90	Negative	Negative	Negative	Negative				Central	House		no	no	no	yes	yes	no		no	yes	NA	yes	yes	yes	2	4	2	yes	38.3	yes	yes	no		yes	yes	1	0	1	1	1	0	1	1	0	0	1	0	0	0
H	91	Positive	Negative	Positive	Positive	Negative	DENV-1	33.77	Capital	NA		NA	NA	NA	NA	NA	NA		yes	yes	NA	Unknown	Possible	yes	5	5	5	yes	39	yes	yes	no		yes	yes	1	0	1	0	0	0	0	1	1	1	1	0	0	0
H	92	Negative	Positive	Positive	Negative				Central	NA		no	yes	no	yes	yes	no		no	no		NA	yes	yes	7	7	7	yes	41	yes	yes	no		yes	yes	1	0	1	0	0	0	0	1	0	1	1	0	0	0
H	93	Positive	Negative	Negative	Positive	Negative	DENV-1	27.03	Central	House		NA	yes	no	yes	yes	no		no	yes	NA	no	Possible	yes	3	3	3	yes	39	no		no		yes	yes	1	1	1	0	0	0	0	0	1	0	1	0	0	0
H	94	Negative	Negative	Negative	Positive	Negative	DENV-1	23.94	Central	NA		no	no	no	yes	yes	no		no	NA		yes	no	yes	3	3	3	Tactile		yes	yes	NA		yes	yes	1	1	1	1	0	0	0	0	1	0	0	0	0	0
H	95	Positive	Negative	Negative	Positive		DENV-1	30.74	Central	House		yes	NA	yes	NA	yes	no		no	yes	NA	Unknown	Possible	yes	4	4	4	yes	39	yes	yes	yes	yes	yes	yes	1	0	1	1	0	0	0	1	1	1	1	0	0	0
H	96	Positive	Negative	Negative	Positive	Negative	DENV-1	19.87	Central	NA		no	NA	no	yes	yes	no		no	yes	NA	NA	Possible	yes		2	2	yes	39	yes	yes	no		yes	yes	1	1	1	0	0	0	0	1	1	0	0	0	0	0
H	97	Positive	Positive	Positive	Negative				Central	House		no	yes	no	yes	yes	no		no	no		NA	Possible	yes	8	8	8	yes	38.5	yes	yes	NA		yes	yes	1	1	1	0	1	0	0	1	1	1	1	0	0	0
H	98	Positive	Positive	Negative	Positive	Positive	DENV-1	39.06	Central	NA		NA	NA	NA	NA	NA	NA		NA	NA		NA	Possible	yes	7	7	7	yes	38	yes	yes	yes	yes	yes	yes	1	1	1	0	0	0	0	0	1	1	0	0	0	0
H	99	Positive	Negative	Negative	Positive		DENV-1	20.97	Central	House		NA	yes	no	no	yes	no		no	NA		no	Possible	yes	3	3	3	yes	40	yes	yes	no		yes	yes	1	0	1	1	1	0	1	1	1	1	0	1	0	0
H	100	Negative	Negative	Negative	Positive	Negative	DENV-1	24.74	Central	House		no	yes	no	yes	yes	no		no	yes	NA	Vaccinated	yes	yes	3	3	3	Tactile		yes	yes	yes	yes	yes	yes	1	1	1	1	0	0	1	1	1	1	1	0	0	0
H	101	Positive	Negative	Negative	Positive		DENV-1	19.72	NA	House		no	no	no	yes	yes	no		no	yes	no	no	no	yes	3	3	3	Tactile		no		no		no	yes	1	1	0	0	1	0	0	0	1	0	0	0	0	0
H	102	Negative	Negative	Negative	Positive	Positive	DENV-1	22.34	Central	House		no	yes	no	yes	yes	yes	no	no	yes	yes	Vaccinated	yes	yes	1	2	1	NA		no		no		NA	NA	1	1	1	0	0	1	0	0	0	0	0	0	0	0
H	103	Negative	Negative	Negative	Negative	Negative			Central	Apartment		no	yes	no	no	yes	yes	no	no	yes	NA	Unknown	no	yes	2	3	2	Tactile		no		no		yes	yes	1	1	1	0	0	0	1	1	1	1	1	0	0	0
H	104	Negative	Negative	Negative	Negative	Negative			Central	House		no	yes	no	yes	yes	no		no	yes	yes	yes	no	yes	4	5	4	yes	39	NA		NA		NA	NA	1	1	0	0	0	1	0	0	1	0	1	0	0	0
H	105	Negative	Positive	Negative	Negative	Positive			Central	House		no	no	no	yes	yes	no		no	no		Unknown	no	yes	2	2	2	Tactile		no		no		yes	yes	1	1	0	0	1	0	0	0	0	0	0	0	1	0
H	106	Negative	Negative	Positive	Negative				Central	House		NA	yes	no	yes	yes	no		no	yes	no	yes	no	yes	5	5	5	yes	40	no		yes	yes	yes	yes	1	0	0	0	0	0	1	0	1	1	1	0	0	0
H	107	Negative	Positive	Negative	Positive	Positive	DENV-1	28.26	Central	House		NA	no	no	no	yes	no		no	NA		no	yes	yes	2	2	2	yes	39.5	yes	yes	no		yes	yes	1	0	1	0	1	0	0	1	0	0	0	0	0	0
H	108	Negative	Negative	Negative	Negative	Negative			Central	NA		yes	no	no	yes	yes	yes	yes	no	yes	NA	Vaccinated	no	yes	2	2	2	yes	39	yes	yes	no		yes	yes	1	1	1	0	0	1	0	1	1	0	1	0	0	1
H	109	Positive	Negative	Negative	Positive	Negative	DENV-1	22.65	Central	NA		no	no	yes	yes	yes	no		no	no		NA	Possible	yes	2	2	2	yes	38	yes	yes	no		NA	NA	1	1	1	0	1	1	0	1	0	0	0	0	0	0
H	110	Negative	Positive	Negative	Negative	Negative			Central	NA		NA	NA	NA	NA	NA	NA		NA	NA		NA	yes	yes	6	6	6	yes	39	yes	yes	no		yes	yes	1	1	1	1	1	1	1	1	1	0	1	0	0	0
H	111	Negative	Negative	Negative	Negative	Negative			Central	NA		NA	yes	yes	yes	yes	yes	yes	no	yes	yes	yes	no	yes	8	8	8	yes	39.4	yes	yes	yes	yes	yes	yes	0	1	1	0	1	1	0	0	1	0	1	1	0	0
H	112	Negative	Positive	Negative	Negative	Positive			Central	NA		no	no	yes	yes	yes	no		no	yes	NA	Unknown	yes	yes	7	7	7	yes	40	yes	yes	no		yes	yes	1	0	1	0	1	1	0	1	1	1	0	0	0	0
H	114	Positive	Positive	Positive	Positive	Negative	DENV-1	30.96	Central	NA		NA	yes	no	yes	yes	no		no	yes	NA	no	no	yes	4	4	4	yes	40	yes	yes	no		yes	yes	1	1	1	1	1	1	1	1	1	1	1	0	0	0
H	115	Positive	Positive	Positive	Positive	Negative	DENV-1	23.83	Central	NA		NA	yes	no	yes	yes	no		yes	yes	yes	yes	yes	yes	4	4	4	yes	39	no		no		yes	yes	1	1	0	0	0	1	0	0	1	0	0	0	0	0
H	116	Negative	Positive	Negative	Negative	Positive			Central	NA		NA	yes	no	yes	yes	no		no	yes	NA	NA	yes	yes	5		5	yes	39	yes	yes	no		no	no	1	0	1	1	1	1	0	0	1	1	1	0	0	0
H	117	Positive	Negative	Negative	Positive	Negative	DENV-1	24.89	Central	NA		NA	no	no	no	yes	no		no	yes	NA	Unknown	no	yes	2	2	2	yes	38.5	yes	yes	yes	NA	yes	yes	1	0	1	0	0	1	0	1	1	1	1	0	0	0
H	118	Negative	Negative	Negative	Positive	Negative	DENV-1	25.46	Central	NA		NA	yes	no	yes	yes	no		no	NA		yes	yes	yes	2	2	2	yes	37.5	no		no		yes	yes	1	1	0	0	0	1	0	1	0	0	0	0	0	0
H	119	Positive	Negative	Positive	Positive		DENV-1	36.85	Central	NA		no	yes	no	yes	yes	no		no	yes	no	yes	no	yes	8	8	8	yes	40	no		no		yes	yes	1	0	0	0	0	1	0	1	0	0	0	0	1	1
H	120	Negative	Positive	Negative	Positive	Positive	DENV-1	37.19	Central	NA		no	no	no	yes	yes	no		no	yes	NA	yes	yes	yes	3	8	3	yes	40	yes	yes	yes	yes	yes	yes	1	1	1	0	0	0	0	0	0	0	0	0	0	0
H	121	Positive	Negative	Negative	Positive		DENV-1	30.19	Central	Apartment		no	yes	no	yes	yes	yes	no	no	yes	NA	Unknown	yes	yes		6	6	yes	39	yes	yes	no		yes	yes	1	1	1	1	1	1	0	0	1	0	0	0	1	0
H	123	Positive	Negative	Negative	Positive		DENV-1	19.17	Central	NA		no	yes	no	yes	yes	no		no	NA		NA	no	yes	2	2	2	yes	38.5	yes	yes	no		no	no	0	0	1	1	1	0	1	0	1	0	1	0	0	0
H	124	Negative	Negative	Negative	Negative		-	39.84	Central	NA		no	yes	yes	yes	yes	no		no	NA		NA	no	yes	1	1	1	NA		no		yes	yes	yes	yes	0	0	0	0	0	1	1	0	1	1	0	0	0	1
H	125	Positive	Negative	Negative	Positive		DENV-1	21.99	Central	NA		no	no	no	yes	yes	no		no	yes	NA	NA	no	yes	3	3	3	yes	40	yes	yes	yes	yes	yes	yes	1	1	1	0	0	1	0	0	1	0	1	0	0	1
H	126	Negative	Negative	Negative	Negative	Positive			Central	NA		NA	yes	no	yes	yes	no		yes	yes	no	yes	yes	yes	5	5	5	yes	39	yes	yes	no		yes	yes	1	1	1	0	0	1	0	0	1	1	0	1	1	0
H	127	Negative	Negative	Positive	Positive		DENV-1	42.7	Central	NA		NA	yes	no	yes	yes	no		yes	yes	NA	NA	yes	yes	7	7	7	yes	39	yes	yes	yes	yes	yes	yes	1	1	1	0	1	1	0	1	1	1	1	1	1	0
H	128	Positive	Negative	Positive	Positive		DENV-1	29.75	Central	NA		no	yes	no	yes	yes	no		no	NA		NA	NA	yes	3	3	3	yes	40	yes	yes	no		yes	yes	1	1	1	0	1	0	1	1	0	0	0	0	0	0
H	129	Positive	Negative	Negative	Positive	Negative	DENV-1	27.39	Central	NA		no	yes	no	yes	yes	no		no	NA		NA	no	yes	4	4	4	yes	39	yes	yes	no		yes	yes	1	1	1	0	1	1	0	1	1	1	0	0	1	0
H	130	Negative	Negative	Negative	Negative	Negative			Central	House		NA	no	no	yes	yes	no		no	NA		yes	yes	yes	3	3	3	yes	40	NA		yes	yes	yes	yes	1	1	1	1	1	1	1	0	1	1	1	0	0	0
H	131	Negative	Negative	Negative	Positive		DENV-2		Central	House		no	yes	no	yes	yes	no		no	yes	NA	NA	yes	yes	3	3	3	yes	39	yes	yes	no		yes	yes	1	0	1	0	1	1	0	0	1	0	0	0	0	0
H	132	Positive	Negative	Negative	Positive		DENV-1	20.46	Central	NA		NA	yes	no	yes	yes	no		no	yes	NA	NA	no	yes	3	3	3	yes	39	no		no		no	no	1	0	0	1	0	0	0	0	0	0	1	0	0	0
H	133	Positive	Positive	Negative	Positive	Indeterminate	DENV-1	33.54	Central	NA		NA	yes	no	yes	yes	no		no	yes	NA	NA	no	yes	5	5	5	yes	39.4	yes	yes	yes	yes	yes	yes	1	1	1	1	1	1	0	1	1	1	0	0	0	0
H	134	Negative	Positive	Positive	Positive	Negative	DENV-1	39.42	Central	NA		NA	yes	no	yes	yes	no		no	no		Unknown	no	yes	7	7	7	yes	40	yes	yes	yes	yes	yes	yes	1	1	1	0	1	1	0	0	1	1	1	1	1	0
H	135	Negative	Positive	Negative	Negative	Positive	-	39.95	Central	NA		yes	yes	no	yes	yes	no		NA	yes	NA	NA	yes	yes	8	8	8	yes	40	yes	yes	yes	yes	yes	yes	1	1	1	1	0	1	1	1	1	1	0	1	1	0
H	136	Negative	Negative	Negative	Negative				Central	NA		NA	yes	yes	yes	yes	no		no	NA		yes	no	yes	4	4	4	yes	38.5	no		no		yes	yes	1	0	0	0	0	0	0	1	1	0	0	0	0	0
H	137	Positive	Negative	Positive	Positive		DENV-1	30.19	Central	NA		NA	NA	NA	NA	NA	no		NA	NA		NA	no	yes	5	5	5	yes	39	yes	yes	yes	yes	yes	yes	1	1	1	0	0	1	0	0	1	1	0	0	0	0
H	138	Negative	Positive	Negative	Negative	Negative			Central	NA		NA	NA	NA	NA	NA	NA		NA	NA		NA	NA	yes	4	4	4	yes	40	no		no		yes	yes	0	0	0	1	0	1	0	0	0	0	0	0	0	0
H	139	Positive	Negative	Negative	Positive		DENV-1	19.98	Central	House		no	yes	yes	yes	yes	no		no	yes	NA	NA	no	yes	4		4	yes	39	yes	no	yes	yes	yes	yes	1	1	1	0	0	1	0	1	1	0	0	0	0	0
H	140	Negative	Negative	Negative	Negative				Central	NA		NA	yes	no	no	yes	no		no	yes	NA	NA	yes	yes	3	3	3	yes	39	no		NA		yes	yes	1	1	0	1	1	1	0	1	1	0	0	0	0	0
H	141	Negative	Negative	Negative	Negative	Negative			Central	NA		no	yes	no	yes	yes	no		yes	no		yes	yes	yes	2	4	2	yes	39	NA		no		yes	yes	0	1	0	0	1	1	0	0	1	1	0	0	0	0
H	142	Negative	Positive	Negative	Negative	Positive			Central	House		no	yes	no	yes	yes	no		no	yes	NA	NA	no	yes	3	3	3	yes	38	no		no		NA	yes	1	1	0	0	0	1	0	0	0	0	0	0	1	0
H	143	Positive	Negative	Negative	Positive	Negative	DENV-1	19.87	Central	House		no	yes	no	yes	yes	no		no	NA		NA	no	yes	3	3	3	yes	38	no		yes	yes	yes	yes	1	1	0	0	0	1	0	0	0	0	1	0	0	0
H	144	Negative	Negative	Negative	Negative	Negative			Central	NA		NA	NA	NA	NA	no	no		no	NA		NA	yes	yes	2	2	2	yes	38.6	yes	yes	no		yes	yes	1	1	1	1	0	1	0	1	1	1	0	0	0	0
H	145	Negative	Positive	Negative	Negative	Positive			Central	House		no	yes	no	yes	yes	no		no	NA		Unknown	no	yes	2	2	2	yes	38	yes	yes	no		yes	yes	1	1	1	0	0	1	1	0	1	0	0	0	1	0
H	146	Positive	Negative	Negative	Negative				Central	NA		NA	yes	no	NA	NA	no		no	NA		NA	no	yes	6	8	6	yes	38	yes	yes	yes	yes	yes	yes	1	1	1	0	0	1	0	0	0	0	1	1	0	0
H	147	Positive	Negative	Negative	Negative				Central	House		no	yes	no	yes	yes	no		no	yes	NA	NA	no	yes	4	4	4	yes	37.9	yes	yes	no		no	no	1	1	1	0	0	0	0	1	0	0	0	0	0	0
H	148	Negative	Negative	Negative	Negative	Negative			Central	House		no	yes	no	yes	yes	no		no	NA		NA	yes	yes	5	5	5	yes	39	yes	yes	no		yes	yes	1	1	1	0	0	1	1	1	1	1	1	0	0	0
H	149	Positive	Negative	Negative	Positive	Negative	DENV-1	18.97	Central	House		no	NA	no	yes	yes	no		no	yes	yes	NA	no	yes	2		2	yes	38	yes	yes	NA		yes	yes	1	1	1	0	1	1	0	1	1	1	0	0	0	0
H	150	Negative	Positive	Negative	Negative	Negative			Central	House		NA	yes	no	yes	yes	no		no	yes	NA	Unknown	yes	yes	2	2	2	yes	38	yes	yes	no		yes	yes	1	1	1	0	0	1	1	0	0	0	0	0	0	0
H	151	Positive	Negative	Negative	Positive	Negative	DENV-1	22.79	Central	NA		NA	NA	NA	NA	NA	NA		NA	yes	NA	NA	no	yes	4	5	4	yes	39	yes	yes	no		yes	yes	1	1	1	0	0	1	1	1	1	1	1	0	0	0
H	152	Negative	Negative	Negative	Negative	Negative			Central	House		no	yes	no	yes	yes	no		no	yes	NA	NA	no	yes	2	3	2	yes	39	yes	yes	no		yes	yes	1	1	1	0	1	1	1	1	1	0	0	1	0	0
H	153	Positive	Positive	Positive	Positive	Negative	DENV-1	29.03	Central	House		no	yes	no	yes	yes	no		no	NA		Unknown	no	yes	5	5	5	yes	39	yes	yes	no		yes	yes	1	0	1	0	0	0	1	1	0	0	0	1	1	0
H	154	Negative	Negative	Negative	Negative	Negative			Central	House		no	yes	no	yes	yes	no		no	yes	NA	NA	no	yes	2	2	2	yes	39	no		no		NA	yes	1	1	0	1	0	0	1	0	1	0	0	0	0	0
H	155	Negative	Positive	Negative	Negative	Negative			Central	House		no	no	no	yes	yes	no		no	yes	NA	Unknown	no	NA			NA			no		no		yes	yes	0	0	0	0	0	0	0	0	0	0	0	1	0	0
H	156	Positive	Positive	Positive	Positive	Positive	DENV-1	32.04	Central	House		no	yes	no	yes	yes	no		no	yes	yes	Unknown	no	yes	5	5	5	yes	39	yes	yes	yes	yes	yes	yes	1	1	1	0	1	1	1	1	1	0	0	0	0	0
H	157	Negative	Negative	Negative	Negative	Negative			Central	NA		no	yes	no	yes	yes	no		no	yes	NA	NA	yes	yes	3	3	3	yes	39	yes	yes	no		yes	yes	1	1	1	1	1	1	0	0	1	0	1	0	0	0
H	158	Negative	Negative	Negative	Negative	Positive			Central	House		no	yes	no	yes	yes	no		no	NA		NA	no	no			NA			no		no		yes	yes	1	1	0	1	0	1	1	1	1	0	0	0	0	0
H	159	Negative	Negative	Negative	Positive	Positive	DENV-4	33.38	Central	House		no	yes	no	yes	yes	no		yes	NA		NA	yes	yes	3	3	3	yes	39	yes	yes	no		yes	yes	1	1	1	0	0	0	0	0	1	1	0	0	0	0
H	160	Negative	Positive	Negative	Negative				Central	NA		NA	NA	NA	NA	NA	no		no	yes	yes	Unknown	NA	yes	2	2	2	yes	39	no		no		NA	yes	1	1	0	0	0	1	0	0	1	0	0	0	0	0
H	161	Negative	Negative	Negative	Negative	Indeterminate			Central	NA		NA	NA	NA	NA	NA	NA		NA	yes	NA	NA	no	yes	6	6	6	yes	38	yes	yes	no		yes	yes	1	1	1	0	0	1	0	1	0	0	0	1	0	0
H	162	Positive	Negative	Negative	Positive	Positive	DENV-1	23.3	Central	Other	NA	NA	NA	NA	NA	NA	NA		no	NA		NA	no	yes	5	5	5	yes	38	yes	yes	no		yes	yes	1	1	1	0	0	1	0	0	1	1	0	0	0	0
H	163	Negative	Negative	Negative	Negative	Negative			Central	Other	NA	NA	NA	NA	NA	NA	no		no	yes	NA	NA	yes	yes	3	3	3	yes	38	yes	yes	no		yes	yes	1	1	1	0	0	0	1	0	1	0	0	0	0	0
H	164	Positive	Negative	Negative	Positive	Negative	DENV-1	29.14	Central	House		no	yes	no	yes	yes	NA		yes	NA		NA	no	yes	4	4	4	yes	39	no		no		yes	yes	1	1	0	0	0	1	0	0	0	1	0	0	0	0
H	165	Positive	Negative	Negative	Positive	Positive	DENV-1	21.75	Central	Other	NA	NA	NA	NA	NA	NA	NA		yes	NA		NA	no	yes	3	3	3	yes	41	yes	yes	no		yes	yes	1	1	1	0	1	1	0	0	1	0	0	0	0	0
H	166	Positive	Negative	Negative	Positive	Negative	DENV-1	27.77	Central	House		NA	yes	no	yes	yes	no		no	no		NA	no	yes	4	4	4	yes	39	no		no		yes	yes	0	1	0	1	1	1	1	0	1	1	0	0	0	1
H	167	Negative	Negative	Negative	Positive	Negative	DENV-1	27.22	Central	House		no	yes	no	yes	yes	no		no	no		NA	yes	yes	3	3	3	yes	39	yes	yes	no		yes	yes	1	1	1	0	0	1	0	0	0	1	0	0	0	0
H	168	Negative	Negative	Positive	Negative				Central	House		no	yes	no	yes	yes	no		no	NA		NA	yes	yes	2	2	2	NA		yes	yes	no		yes	yes	1	1	1	0	0	1	1	1	1	0	0	0	0	0
H	169	Negative	Positive	Negative	Positive	Positive	DENV-1	39.63	Central	House		no	yes	no	yes	yes	no		no	no		NA	yes	yes	5	5	5	yes	39	yes	yes	no		NA	NA	1	1	1	0	0	1	1	0	0	0	1	0	0	0
H	170	Negative	Positive	Negative	Negative	Positive			Central	House		no	yes	no	no	yes	no		yes	yes	NA	NA	no	yes	5	5	5	NA		yes	yes	no		yes	yes	1	1	1	0	0	0	0	1	0	0	1	0	0	0
H	171	Negative	Positive	Negative	Positive	Negative	DENV-1	28.03	Central	House		no	yes	no	yes	yes	no		no	NA		NA	no	yes	2	2	2	yes	39	yes	yes	no		yes	yes	1	1	1	0	0	1	0	1	1	0	1	0	0	0
H	172	Negative	Negative	Negative	Negative		-	39.66	Central	House		no	yes	no	yes	yes	no		no	NA		NA	yes	yes	6	6	6	yes	39	yes	yes	yes	yes	yes	yes	1	1	1	0	0	1	1	1	1	0	0	0	0	1
H	173	Negative	Negative	Negative	Negative	Negative			Central	House		NA	yes	no	yes	yes	no		no	yes	NA	Unknown	no	yes	2	2	2	yes	39	yes	yes	no		yes	yes	1	1	1	0	0	0	0	1	0	0	1	0	0	0
H	174	Positive	Negative	Positive	Positive		DENV-1	37.98	Central	Other	NA	NA	no	no	NA	no	NA		yes	yes	NA	Unknown	no	yes	6	6	6	yes	39	yes	yes	yes	yes	NA	yes	1	1	1	0	0	0	1	1	1	1	0	0	1	1
H	175	Negative	Positive	Positive	Positive	Positive	DENV-2	38.14	Central	Other	NA	NA	yes	no	yes	no	no		no	yes	no	NA	no	yes	6	6	6	yes	40	yes	yes	yes	yes	yes	yes	1	1	1	1	0	1	0	1	1	1	0	1	1	0
H	176	Negative	Negative	Negative	Positive	Negative	DENV-4	39.97	Central	Other	NA	NA	NA	NA	NA	NA	NA		NA	NA		NA	no	yes	4	6	4	yes	38	yes	yes	no		yes	yes	1	1	1	0	0	1	0	0	0	0	0	0	0	0
H	177	Positive	Negative	Positive	Positive	Negative	DENV-1	29.93	Central	Other	NA	no	yes	no	yes	yes	no		no	no		NA	no	yes	5	5	5	yes	38	yes	yes	no		yes	yes	1	1	1	0	0	0	0	0	1	1	0	0	0	0
H	178	Positive	Positive	Negative	Positive	Negative	DENV-4	35.08	Central	Other	NA	NA	NA	NA	NA	NA	NA		NA	NA		NA	yes	yes	3	3	3	yes	39	no		no		yes	yes	1	1	0	1	1	1	1	1	1	1	1	0	0	0
H	180	Positive	Negative	Negative	Positive	Negative	DENV-1	35.68	Central	Other	NA	NA	NA	NA	NA	NA	NA		NA	NA		NA	no	yes	5	6	5	yes	40	yes	yes	no		yes	yes	1	1	1	1	1	1	0	1	1	1	0	1	1	0
H	181	Positive	Negative	Negative	Positive		DENV-1	37.85	Central	House		no	yes	no	yes	yes	no		no	yes	NA	NA	no	yes	6	6	6	yes	40	yes	yes	yes	yes	yes	yes	1	1	1	0	0	1	0	1	0	0	0	1	0	1
H	182	Positive	Negative	Positive	Positive		DENV-1	35	Central	House		no	yes	yes	yes	no	no		no	yes	NA	NA	no	yes	6	6	6	yes	38	no		yes	yes	yes	yes	1	1	0	0	0	1	0	0	0	0	0	0	0	0
H	183	Positive	Negative	Negative	Positive		DENV-1	25.28	Central	Other	NA	NA	NA	NA	NA	NA	NA		no	yes	NA	NA	no	yes	2	3	2	yes	38	yes	yes	no		yes	yes	1	0	1	0	0	1	1	0	1	1	1	0	1	0
H	184	Positive	Negative	Positive	Positive		DENV-1	37.36	Central	Other	NA	NA	NA	NA	NA	NA	NA		yes	NA		NA	no	yes	7	7	7	yes	39	no		no		yes	NA	1	1	0	0	0	1	0	0	1	1	1	0	0	0
H	185	Negative	Positive	Negative	Negative	Positive			Central	Other	NA	NA	NA	NA	NA	NA	NA		NA	yes	yes	NA	yes	yes	4	4	4	yes	40	yes	yes	no		yes	yes	1	1	1	0	0	1	0	0	1	1	1	0	0	0
H	186	Negative	Negative	Negative	Negative	Negative			Central	Other	NA	no	no	NA	yes	yes	no		no	yes	NA	NA	yes	yes	2	2	2	yes	38	no		no		yes	yes	1	1	0	0	0	0	1	1	0	0	0	0	0	0
H	187	Negative	Positive	Negative	Negative	Negative			Central	House		no	yes	NA	yes	yes	no		no	yes	NA	no	Possible	yes	2	2	2	yes	40	yes	yes	no		yes	yes	1	1	1	0	0	1	0	1	1	1	0	0	1	0
H	188	Negative	Negative	Negative	Negative		-	39.7	Central	Other	NA	NA	NA	NA	NA	NA	NA		NA	NA		NA	no	yes	3	3	3	yes	39	yes	yes	no		yes	yes	1	1	1	0	0	1	0	1	0	0	0	0	0	0
X	1	Negative	Positive	Negative	Negative	Negative			Capital	House		no	NA	no	yes	yes	no		no	yes	NA	yes	yes	no		3	3			yes	yes	yes	yes	yes	yes	0	1	0	0	0	0	0	0	0	0	0	1	0	0
X	2	Positive	Negative	Positive	Positive		DENV-1	36.82	Central	House		no	NA	no	yes	yes	no		no	yes	NA	Unknown	no	yes	6	6	6	yes	39.5	no		no		no	yes	1	0	0	0	0	0	0	1	0	0	1	0	0	0
X	3	Positive	Negative	Negative	Positive		DENV-1	24.19	Central	House		NA	NA	no	yes	yes	no		no	yes	NA	Unknown	yes	yes	2	2	2	Tactile		no		yes	yes	no	no	0	1	0	0	0	0	0	1	0	0	0	0	0	0
X	4	Negative	Negative	Negative	Negative	Negative			Central	Apartment		no	NA	no	yes	yes	no		yes	yes	NA	Vaccinated	yes	yes	2	8	2	Tactile		yes	yes	no		yes	no	1	0	0	0	0	0	0	0	1	0	0	0	0	0
X	5	Negative	Positive	Negative	Negative	Negative			Central	House		NA	NA	no	yes	yes	no		yes	yes	NA	yes	yes	no		5	5			no		no		yes	yes	0	0	0	0	0	0	1	0	1	0	0	1	0	0
X	6	Negative	Positive	Positive	Negative				Capital	House		no	yes	no	yes	yes	no		no	yes	yes	yes	yes	yes	7	8	7	yes	38.5	no		no		yes	yes	1	1	1	0	0	0	1	0	1	1	0	0	0	0
X	8	Positive	Negative	Negative	Positive		DENV-1	21.76	Capital	House		NA	yes	yes	yes	yes	no		no	no		no	Possible	yes	3	3	3	yes	39	yes	yes	yes	yes	yes	yes	1	1	1	0	0	0	0	1	0	0	0	0	0	0
X	9	Negative	Negative	Negative	Negative	Negative			Capital	House		no	no	no	yes	yes	no		no	yes	NA	yes	yes	yes	3	3	3	yes	38.3	no		no		yes	no	1	1	1	0	0	0	0	1	1	0	1	0	0	0
X	10	Negative	Negative	Negative	Negative	Negative			Capital	House		no	yes	no	yes	yes	no		no	yes	NA	no	yes	yes	6	6	6	NA		no		yes	yes	no	yes	0	0	0	0	0	0	0	0	0	0	1	1	0	1
X	11	Negative	Positive	Negative	Negative	Positive			Capital	House		no	yes	yes	yes	yes	no		yes	yes	NA	yes	no	yes	2		2	Tactile		no		no		no	yes	1	1	0	0	1	0	0	0	1	0	0	0	0	0
X	12	Positive	Negative	Negative	Positive		DENV-1	19.79	Central	House		no	yes	no	yes	yes	no		no	no		yes	no	yes	3	3	3	yes	40	yes	yes	no		no	no	0	0	0	0	0	0	0	0	0	0	1	0	0	0
X	13	Positive	Negative	Negative	Positive		DENV-1	24.08	Capital	House		no	no	no	yes	yes	no		yes	yes	NA	yes	yes	yes	3	3	3	yes	38.8	no		no		no	yes	1	1	0	0	1	0	0	0	1	0	0	0	0	0
X	14	Negative	Positive	Positive	NR				Central	House		no	yes	no	yes	yes	no		no	yes	NA	no	yes	yes	4	6	4	Tactile		yes	yes	yes	yes	no	yes	1	1	0	0	0	0	0	0	1	1	1	0	1	0
X	15	Positive	Negative	Negative	Positive		DENV-1	17.2	Central	House		yes	yes	no	yes	yes	yes	no	no	yes	yes	no	no	yes	2	2	2	Tactile		yes	yes	no		yes	no	1	1	1	1	0	0	0	0	1	0	0	0	0	0
X	16	Negative	Negative	Negative	Negative	Negative			Capital	House		no	yes	no	yes	yes	yes	yes	no	no		Vaccinated	yes	yes	4	4	4	yes	38.5	no		no		yes	no	1	1	1	1	0	0	1	1	1	0	1	0	0	0
X	17	Negative	Negative	Negative	Negative	Negative			Central	House		no	no	no	yes	yes	yes	yes	no	yes	yes	no	yes	yes	2	2	2	Tactile		yes	yes	no		no	yes	1	1	0	1	1	1	1	0	1	1	0	1	1	0
X	18	Negative	Negative	Negative	Negative				Central	House		yes	yes	no	yes	yes	no		yes	yes	no	no	yes	yes	3	3	3	Tactile		no		no		yes	yes	1	1	1	0	0	0	0	1	1	0	0	1	0	0
X	19	Negative	Positive	Negative	Negative	Negative			Central	House		yes	no	no	yes	yes	no		no	yes	yes	yes	no	yes	2	3	2	yes	38.9	yes	yes	no		no	yes	1	1	1	1	0	0	0	0	1	0	0	0	0	0
X	20	Negative	Negative	Negative	Negative	Negative			Capital	House		no	yes	no	yes	yes	no		no	yes	no	yes	no	no		2	2			NA		no		no	yes	1	1	0	0	0	0	0	0	1	1	0	0	0	0
X	22	Negative	Negative	Negative	Negative				Capital	House		no	yes	yes	yes	yes	yes	yes	no	no		no	no	yes	3	3	3	yes	38.6	no		no		no	no	0	1	0	0	0	0	1	0	0	0	1	0	0	0
X	23	Negative	Negative	Negative	Positive		DENV-1	22.61	Capital	House		no	no	no	yes	yes	no		no	yes	yes	yes	no	yes	3	4	3	yes	37.6	yes	yes	no		no	yes	0	1	0	1	0	0	0	0	0	0	0	0	0	0
X	24	Negative	Negative	Negative	Negative	Negative			Capital	House		no	yes	no	yes	yes	no		no	yes	no	yes	no	yes	4	4	4	yes	37.5	no		no		no	yes	1	1	0	0	0	0	1	1	0	0	0	0	0	0
X	25	Negative	Positive	Negative	Negative	Negative			Central	House		no	no	no	yes	yes	yes	yes	no	yes	yes	yes	yes	yes	5	5	5	NA		no		no		yes	yes	1	1	0	0	1	1	1	0	1	1	1	0	1	0
X	26	Positive	Positive	Positive	Positive	Negative	DENV-1	29.24	Central	House		yes	no	no	no	yes	yes	yes	no	no		yes	no	yes	4	4	4	yes	38.5	yes	yes	yes	yes	NA	NA	1	1	0	0	0	0	1	0	0	1	0	0	0	0
X	27	Positive	Positive	Negative	Positive	Negative	DENV-1	28.58	Central	House		yes	yes	no	yes	yes	no		no	yes	no	yes	no	yes	3	4	3	Tactile		no		no		no	yes	1	1	1	0	0	0	0	0	1	0	0	0	0	0
X	28	Negative	Positive	Negative	Negative	Positive			Central	House		yes	no	no	yes	yes	no		no	yes	no	Unknown	yes	yes	2	2	2	Tactile		no		no		no	yes	1	0	0	0	0	0	0	1	1	1	0	0	0	0
X	29	Positive	Positive	Positive	Positive	Negative	DENV-1	28.67	Capital	Apartment		no	no	no	yes	yes	yes	yes	no	yes	no	Vaccinated	no	yes	3	3	3	Tactile		no		no		no	no	1	1	1	0	0	0	0	0	1	0	0	0	0	0
X	30	Negative	Negative	Negative	Negative	Negative			Capital	House		no	yes	no	yes	yes	no		no	yes	no	no	no	yes	5	5	5	yes	38.9	yes	yes	no		yes	no	1	1	1	0	0	1	0	1	0	0	0	0	0	0
X	31	Negative	Negative	Negative	Positive				Central	House		no	yes	no	yes	yes	no		yes	yes	no	Unknown	yes	yes	2	2	2	Tactile		no		no		yes	yes	1	1	1	0	0	1	1	0	1	0	0	0	0	0
X	32	Positive	Negative	Negative	Positive		DENV-1	35.36	Capital	House		no	yes	no	yes	yes	no		no	yes	no	yes	no	yes	5	5	5	yes	39	no		no		yes	yes	1	1	0	0	0	0	0	0	0	0	0	0	0	0
X	33	Negative	Negative	Negative	Positive				Central	Apartment		no	yes	no	yes	yes	yes	NA	yes	yes	yes	Vaccinated	no	yes	5	5	5	yes	39	no		no		yes	no	1	1	1	0	0	0	1	0	1	0	0	1	0	0
X	34	Negative	Positive	Positive	Negative				Central	House		no	yes	no	yes	yes	yes	yes	yes	yes	no	Unknown	yes	yes	6	6	6	yes	38	no		no		no	yes	1	1	1	0	0	0	1	0	0	0	1	0	0	0
X	35	Negative	Negative	Negative	Negative	Negative	-	40.38	Capital	Apartment		no	no	no	yes	yes	no		no	no		yes	no	yes	2	2	2	yes	39	no		no		yes	yes	1	1	1	0	0	1	0	0	1	1	0	0	0	0
X	36	Negative	Negative	Negative	Negative	Positive			Central	House		no	yes	no	yes	yes	no		no	yes	no	Unknown	yes	yes	3	3	3	Tactile		no		no		yes	yes	1	1	1	1	0	1	0	0	1	0	0	0	0	0
X	37	Positive	Negative	Negative	Positive		DENV-1	19.57	Central	House		no	no	yes	yes	yes	no		no	yes	yes	no	no	yes	2	2	2	yes	39.5	yes	yes	yes	yes	yes	yes	1	1	1	1	0	1	1	1	1	1	1	1	0	0
X	38	Negative	Positive	Negative	Positive	Positive	DENV-1	31.33	Central	House		yes	yes	no	yes	yes	no		no	no		no	no	yes	4	4	4	NA		no		no		no	yes	1	1	0	0	0	0	0	0	1	0	0	0	0	0
X	39	Negative	Positive	Negative	Positive	Positive	DENV-1	28.66	Central	House		no	yes	no	yes	yes	yes	yes	no	yes	no	yes	yes	yes	4	4	4	yes	39.3	no		no		yes	yes	1	1	1	1	1	0	0	1	0	0	0	0	1	0
X	40	Positive	Negative	Negative	Positive		DENV-1	18.37	Central	House		no	yes	no	yes	yes	yes	yes	no	no		no	yes	yes	3	3	3	yes	39	no		no		yes	yes	1	1	1	1	0	1	0	1	1	0	1	0	0	0
X	41	Positive	Positive	Positive	Negative				Central	House		no	no	no	yes	yes	no		yes	yes	no	Vaccinated	no	yes	7	8	7	Tactile		no		no		yes	no	1	1	1	1	0	0	1	0	1	0	0	0	0	0
X	42	Negative	Negative	Negative	Negative	Positive			Central	House		no	no	no	yes	yes	no		no	yes	yes	Vaccinated	no	yes	2	2	2	Tactile		no		no		yes	yes	1	1	1	0	1	0	1	0	1	0	0	0	0	0
X	43	Positive	Positive	Positive	Negative				Central	House		no	no	no	yes	yes	no		no	yes	yes	no	no	yes	7	7	7	Tactile		no		no		no	yes	1	1	1	0	0	1	1	1	1	1	0	0	0	0
X	44	Positive	Positive	Positive	Negative	Negative			Central	House		no	no	no	yes	yes	no		no	yes	NA	no	no	yes	7	7	7	Tactile		no		no		no	yes	1	1	0	0	0	1	0	0	0	0	0	1	1	0
X	45	Positive	Negative	Negative	Positive		DENV-1	21.37	Central	House		no	yes	no	no	yes	no		no	yes	yes	Unknown	yes	yes	3	3	3	Tactile		no		no		no	no	1	1	0	0	0	0	0	0	1	0	0	0	0	0
X	47	Negative	Negative	Negative	Negative	Negative			Central	House		no	no	no	no	yes	no		yes	no		Unknown	no	yes	4	28	4	Tactile		no		no		no	yes	1	1	0	0	0	0	0	0	1	1	0	0	0	0
X	49	Negative	Negative	Negative	Negative	Negative			Central	House		no	yes	no	yes	yes	no		yes	yes	no	Vaccinated	yes	yes	4	6	4	yes	39	no		no		yes	yes	0	1	0	0	0	1	0	0	0	0	0	0	0	0
X	51	Negative	Negative	Negative	Negative	Negative			Capital	Apartment		no	no	no	yes	yes	yes	yes	yes	yes	yes	yes	no	yes	3	3	3	yes	42	no		no		no	yes	1	1	0	1	1	1	0	0	0	0	0	0	0	0
[truncated: 27 more columns]

## Sheet: Lab Results
Site	Code	NS1	IgG	IgM	PCR DENV	ZIKA IgG ELISA	Serotype	Fever	Day of Illness	Peak Temp	Day Sample Taken	Hemoglobin	Hematocrit	Erythrocytes	Platelets	Leucocytes	Neutrophils (%)	Neutrophils	Lymphocytes (%)	Lymphocytes	Monocytes (%)	Monocytes Absolute	Eosinophils (%)	Eosinophils	Basophil (%)	Basophils	CRP	SGPT (U/L)	SGOT (UI/L)	Bilirubin	Urea (mg/dL)	Uric Acid
H	1	Negative	Negative	Negative	Negative	Negative		yes	1		1	12.7	0.374	4490000	240000	9140	0.78	7129.2	0.22	2010.8	0	0	0	0	0	0	Negative
H	2	Negative	Negative	Negative	Negative	Positive		yes	1		2	12.1	0.352	4240000	316000	8080	0.74	5979.2	0.22	1777.6	0	0	0.04	323.2	0	0	Positive	9	18	0.42
H	3	Negative	Positive	Positive	Negative			no	3		3	9.4	0.282	4230000	130000	3020	0.45	1359	0.55	1661	0	0	0	0	0	0		174	149	0.35
H	4	Positive	Positive	Positive	Positive	Negative	DENV1	yes	7	39	7	16.3	0.485	6410000	75000	2930	0.34	996.2	0.61	1787.3	0.05	146.5	0	0	0	0	Positive
H	5	Positive	Negative	Negative	Positive	Negative	DENV1	yes	2	41	2	13.7	0.391	4860000	182000	11000	0.9	9900	0.1	1100	0	0	0	0	0	0
H	6	Positive	Negative	Negative	Positive		DENV1	yes	2		2	14.2	0.393	4900000	322000	6850	0.89	6096.5	0.1	685	0	0	0.01	68.5	0	0	Positive
H	7	Negative	Positive	Negative	Negative	Positive		yes	2		2	14.1	0.423	5010000	350000	20900	0.88	18392	0.11	2299	0	0	0.01	209	0	0	Positive
H	8	Positive	Negative	Negative	Positive	Negative	DENV1	yes	2		2	16.1	0.471	5610000	245000	4930	0.87	4289.1	0.13	640.9	0	0	0	0	0	0	Positive
H	9	Negative	Negative	Negative	Negative			yes	2	39	2	14.8	0.427	4820000	213000	10360	0.79	8184.4	0.21	2175.6	0	0	0	0	0	0	Positive
H	10	Negative	Negative	Negative	Negative			yes	2		2	15.3	0.447	5680000	211000	9040	0.91	8226.4	0.09	813.6	0	0	0	0	0	0	Positive
H	11	Negative	Negative	Negative	Negative	Negative		yes	5	39	5	12.6	0.364	4650000	151000	7190	0.82	5895.8	0.18	1294.2	0	0	0	0	0	0	Positive	82	58
H	12	Negative	Negative	Negative	Negative	Negative		yes	2	38.8	2	13.7	0.399	4900000	240000	12460	0.77	9594.2	0.23	2865.8	0	0	0	0	0	0
H	13	Negative	Negative	Negative	Negative	Positive		no	3		3	11.5	0.344	4620000	288000	12500	0.81	10125	0.18	2250	0	0	0.01	125	0	0		47	23		24
H	14	Negative	Positive	Negative	Negative	Positive		yes	1	38	1	16.9	0.483	5580000	221000	8110	0.72	5839.2	0.27	2189.7	0	0	0.01	81.1	0	0
H	15	Negative	Positive	Negative	Positive	Positive	DENV2	no	2		2	14.9	0.424	4820000	246000	6200	0.61	3782	0.36	2232	0	0	0.03	186	0	0	Positive
H	16	Positive	Negative	Negative	Positive		DENV1	yes	2		2	15.5	0.44	5230000	296000	3700	0.49	1813	0.48	1776	0	0	0.03	111	0	0
H	17	Negative	Negative	Negative	Negative	Positive		yes	4		4	16.2	0.467	5650000	267000	7220	0.59	4259.8	0.41	2960.2	0	0	0	0	0	0	Positive
H	18	Negative	Negative	Negative	Negative	Positive		yes	2	40	2	13.8	0.417	4950000	289000	5440	0.54	2937.6	0.46	2502.4	0	0	0	0	0	0
H	19	Negative	Negative	Negative	Negative	Positive		yes	1		1	13.9	0.395	4630000	230000	17760	0.92	16339.2	0.08	1420.8	0	0	0	0	0	0
H	20	Negative	Negative	Negative	Negative	Negative		yes	4		4	13.6	0.396	4790000	262000	7710	0.84	6476.4	0.15	1156.5	0	0	0.01	77.1	0	0
H	21	Negative	Negative	Negative	Positive	Negative	DENV1	yes	2		2	14.1	0.42	5150000	234000	4230	0.63	2664.9	0.36	1522.8	0	0	0.01	42.3	0	0
H	22	Negative	Positive	Negative	Positive	Positive	DENV1	yes	6	39	6	15.5	0.45	5880000	88000	2500	0.69	1725	0.3	750	0	0	0.01	25	0	0
H	23	Positive	Negative	Negative	Positive	Negative	DENV1	yes	3	40	3	11.7	0.336	3880000	189000	4800	0.65	3120	0.35	1680	0	0	0	0	0	0	Positive
H	24	Negative	Negative	Negative	Negative	Negative		yes	2		2	14.6	0.424	5180000	205000	7900	0.82	6478	0.18	1422	0	0	0	0	0	0
H	25	Negative	Positive	Negative	Negative	Negative		yes	3	41	3	15.1	0.443	5340000	199000	6400	0.73	4672	0.25	1600	0.01	64	0.01	64	0	0
H	26	Negative	Negative	Negative	Negative			yes	3		3	14.2	0.413	5540000	435000	13200	0.85	11220	0.15	1980	0	0	0	0	0	0
H	27	Negative	Positive	Negative	Negative	Positive		yes	5		5	14.9	0.447	5490000	189000	5100	0.69	3519	0.31	1581	0	0	0	0	0	0
H	28	Negative	Negative	Negative	Negative	Positive		yes	2		2	13.7	0.4	5120000	151000	5250	0.5	2625	0.36	1890	0.09	472.5	0.05	262.5	0	0
H	30	Negative	Positive	Negative	Negative	Positive		yes	2	39	2	15.7	0.45	5410000	230000	10500	0.85	8925	0.1	1050	0.05	525	0	0	0	0	Positive
H	31	Negative	Negative	Negative	Negative	Negative		yes	2		2	12	0.36	4350000	240000	7400	0.8	5920	0.2	1480	0	0	0	0	0	0
H	32	Negative	Negative	Negative	Negative	Negative		yes	3	38	3	13.6	0.395	4400000	260000	6350	0.75	4762.5	0.25	1587.5	0	0	0	0	0	0
H	33	Negative	Positive	Negative	Negative	Indeterminate		yes	4	38	4	13.9	0.411	5200000	263000	5640	0.6	3384	0.26	1466.4	0.07	394.8	0.06	338.4	0.01	56.4
H	34	Negative	Negative	Negative	Negative	Negative		yes	4		4	15.4	0.44	5310000	190000	2590	0.58	1502.2	0.38	984.2	0.04	103.6	0	0	0	0
H	35	Positive	Negative	Negative	Positive		DENV1	yes	1	39	1	13.6	0.403	5150000	230000	10460	0.78	8158.8	0.19	1987.4	0.03	313.8	0	0	0	0	Positive
H	36	Negative	Negative	Negative	Negative	Negative		yes	2		2	14	0.414	4930000	270000	7350	0.6	4410	0.34	2499	0.03	220.5	0.03	220.5	0	0	Positive
H	37	Negative	Positive	Negative	Positive	Positive	DENV1	yes	2	40	2	13.6	0.4	4730000	310000	4640	0.77	3572.8	0.21	974.4	0.02	92.8	0	0	0	0
H	38	Negative	Negative	Negative	Negative	Negative		yes	1		1	15	0.454	5900000	240000	7420	0.85	6307	0.15	1113	0	0	0	0	0	0		28	32
H	39	Positive	Negative	Negative	Positive	Negative	DENV1	yes	4		4	14.6	0.417	4910000	274000	3570	0.71	2534.7	0.23	821.1	0.04	142.8	0.01	35.7	0.01	35.7
H	40	Positive	Negative	Negative	Positive	Negative	DENV1	yes	2	38.5	3	12.9	0.382	4420000	220000	2840	0.68	1931.2	0.32	908.8	0	0	0	0	0	0
H	41	Positive	Negative	Negative	Negative			no	2		2	15.6	0.446	5320000	187000	8580	0.71	6091.8	0.28	2402.4	0.01	85.8	0	0	0	0
H	42	Negative	Negative	Negative	Negative			yes	3		2	13.9	0.394	4950000	305000	13980	0.88	12302.4	0.05	699	0.06	838.8	0	0	0.01	139.8
H	43	Negative	Negative	Negative	Negative	Negative		yes	4		4	14.1	0.4	4780000	270000	11190	0.85	9511.5	0.15	1678.5	0	0	0	0	0	0
H	44	Negative	Negative	Negative	Negative			yes	3		3	13.5	0.389	4660000	298000	3210	0.67	2150.7	0.31	995.1	0	0	0.02	64.2	0.01	32.1
H	45	Negative	Positive	Negative	Negative	Positive		yes	2		2	14.5	0.434	5130000	238000	5790	0.78	4516.2	0.22	1273.8	0	0	0	0	0	0
H	47	Negative	Negative	Negative	Positive	Positive	DENV1	yes	2	38	2	13.8	0.4	477000	280000	8140	0.72	5860.8	0.25	2035	0	0	0.03	244.2	0	0
H	48	Positive	Negative	Negative	Positive		DENV1	yes	2	40	2	14.5	0.42	5100000	161000	6800	0.71	4828	0.24	1632	0.04	272	0.01	68	0	0
H	49	Positive	Positive	Positive	Positive		DENV1	yes	5	40	5	14	0.394	4800000	230000	2700	0.5	1350	0.46	1242	0.04	108	0	0	0	0	Negative
H	51	Positive	Negative	Negative	Positive		DENV1	yes	5	38	5	12.5	0.353	4520000	230000	1760	0.6	1056	0.35	616	0.03	52.8	0.02	35.2	0	0		32	45		10	4
H	52	Negative	Negative	Negative	Negative	Positive		yes	3	39.5	3	13.5	0.393	4870000	251000	5400	0.72	3888	0.25	1350	0	0	0.03	162	0	0	Positive	25	28		18	3.2
H	53	Negative	Negative	Negative	Positive	Positive	DENV1	yes	2		2	15	0.45	4880000	213000	3660	0.8	2928	0.15	549	0.05	183	0	0	0	0
H	54	Positive	Negative	Negative	Positive	Indeterminate	DENV1	yes	2	39.5	2	16.7	0.476	5790000	150000	7360	0.75	5520	0.23	1692.8	0.02	147.2	0	0	0	0	Positive
H	55	Positive	Positive	Positive	Positive	Negative	DENV1	yes	5	40	5	11.9	0.351	4820000	140000	2110	0.6	1266	0.37	780.7	0.03	63.3	0	0	0	0
H	56	Positive	Negative	Negative	Positive	Negative	DENV1	yes	3	38.6	3	12.7	0.374	4830000	160000	2320	0.72	1670.4	0.28	649.6	0	0	0	0	0	0
H	57	Negative	Positive	Negative	Negative	Positive		yes	2		2	15.3	0.441	5360000	240000	6680	0.77	5143.6	0.23	1536.4	0	0	0	0	0	0	Positive
H	58	Negative	Negative	Negative	Negative			yes	2	39	2	14	0.406	5060000	290000	14170	0.86	12186.2	0.14	1983.8	0	0	0	0	0	0	Positive
H	60	Negative	Negative	Negative	Positive		DENV1	yes	2	38	2	15.4	0.45	5340000	172000	2400	0.38	912	0.57	1368	0.05	120	0	0	0	0
H	61	Negative	Negative	Negative	Negative			yes	2		2	13.6	0.391	4820000	332000	10910	0.86	9382.6	0.13	1418.3	0	0	0.01	109.1	0	0
H	62	Negative	Negative	Negative	Negative			yes	4	39	4	14.7	0.419	5230000	227000	9430	0.72	6789.6	0.26	2451.8	0.01	94.3	0.01	94.3	0	0
H	63	Negative	Negative	Negative	Positive	Negative	DENV1	yes	2		3	13.1	0.394	4940000	253000	4800	0.68	3264	0.3	1440	0.01	48	0.01	48	0	0
H	64	Negative	Positive	Negative	Positive	Positive	DENV1	yes	5	38.5	5	14.3	0.42	5280000	201000	3950	0.66	2607	0.33	1303.5	0	0	0.01	39.5	0	0
H	65	Positive	Negative	Negative	Positive	Negative	DENV1	yes	5	38.9	5	15.9	0.467	5950000	162000	4420	0.75	3315	0.21	928.2	0.04	176.8	0	0	0	0
H	66	Positive	Negative	Negative	Positive		DENV1	yes	3	38.5	3	15	0.44	5370000	452000	4350	0.62	2697	0.34	1479	0.02	87	0.02	87	0	0
H	67	Positive	Negative	Negative	Positive	Negative	DENV1	yes	3	39	3	13.3	0.407	5120000	179000	1930	0.67	1293.1	0.3	579	0.01	19.3	0.02	38.6	0	0
H	68	Positive	Negative	Negative	Positive	Negative	DENV1	yes	2	39.3	2	13.6	0.397	5100000	270000	4140	0.87	3601.8	0.1	414	0.01	41.4	0.02	82.8	0	0
H	69	Negative	Negative	Negative	Positive	Negative	DENV1	yes	3	38.5	3	14.8	0.433	5210000	155000	3610	0.76	2743.6	0.2	722	0.04	144.4	0	0	0	0
H	70	Negative	Positive	Positive	Positive	Positive	DENV1	yes	5	40	5	12.5	0.36	4530000	72000	1720	0.44	756.8	0.56	963.2	0	0	0	0	0	0
H	71	Negative	Positive	Positive	Positive	Positive	DENV1	yes	7	40	7	15.7	0.46	5570000	51000	8560	0.32	2739.2	0.63	5392.8	0.04	342.4	0.01	85.6	0	0		31	63
H	72	Positive	Negative	Negative	Positive	Negative	DENV1	yes	2	38.5	2	13.7	0.398	4650000	262000	6070	0.88	5341.6	0.12	728.4	0	0	0	0	0	0
H	73	Negative	Negative	Negative	Positive	Negative	DENV1	yes	3	38	3	14.7	0.346	5170000	280000	3450	0.73	2518.5	0.26	897	0.01	34.5	0	0	0	0
H	74	Negative	Positive	Positive	Positive	Negative	DENV1	yes	8	38	8	14.6	0.405	4740000	106000	3090	0.25	772.5	0.7	2163	0.02	61.8	0.02	61.8	0.01	30.9
H	75	Positive	Positive	Positive	Positive	Negative	DENV1	yes	5	38.7	5	13.1	0.38	4580000	253000	3360	0.6	2016	0.4	1344	0	0	0	0	0	0
H	76	Negative	Negative	Negative	Positive		DENV1	yes	2	39	3	13.8	0.4	4400000	355000	2180	0.79	1722.2	0.2	436	0.01	21.8	0	0	0	0
H	77	Negative	Negative	Negative	Negative	Negative		yes	2	38	2	15.1	0.468	5110000	410000	8110	0.87	7055.7	0.13	1054.3	0	0	0	0	0	0
H	78	Positive	Negative	Negative	Positive	Negative	DENV1	yes	2	38.5	2	13.6	0.414	4870000	185000	5330	0.85	4530.5	0.15	799.5	0	0	0	0	0	0		27	40		39	5
H	79	Negative	Negative	Negative	Negative			yes	2	38	2	13.1	0.392	4440000	341000	18800	0.87	16356	0.13	2444	0	0	0	0	0	0
H	81	Negative	Negative	Negative	Negative			yes	2	37.7	3	14.2	0.441	4950000	364000	5180	0.69	3574.2	0.27	1398.6	0.01	51.8	0.03	155.4	0	0
H	82	Positive	Positive	Negative	Positive	Negative	DENV1	NA	8		7	9.7	0.294	3060000	18000	2610	0.63	1644.3	0.24	626.4	0	0	0.11	287.1	0	0		31	104		73
H	83	Positive	Negative	Negative	Positive	Negative	DENV1	yes	5	39	5	12.5	0.382	4170000	147000	1650	0.6	990	0.36	594	0.03	49.5	0.01	16.5	0	0
H	84	Positive	Positive	Positive	Positive	Negative	DENV1	yes	6	41.2	7	12.5	0.37	4030000	80000	2990	0.55	1644.5	0.37	1106.3	0.05	149.5	0.02	59.8	0.01	29.9
H	85	Negative	Positive	Negative	Positive	Positive	DENV1	yes	8	38	8	13	0.386	4310000	98000	8140	0.24	1953.6	0.72	5860.8	0.03	244.2	0	0	0.01	81.4
H	86	Positive	Negative	Negative	Positive	Negative	DENV1	yes	2		2	13.8	0.423	4810000	177000	3490	0.8	2792	0.12	418.8	0.08	279.2	0	0	0	0
H	87	Positive	Positive	Negative	Negative			yes	2	38	2	15	0.467	5390000	182000	8000	0.5	4000	0.47	3760	0	0	0.03	240	0	0
H	89	Positive	Negative	Negative	Positive	Negative	DENV1	yes	5		5	13.4	0.414	4490000	298000	2680	0.56	1500.8	0.42	1125.6	0.01	26.8	0.01	26.8	0	0
H	90	Negative	Negative	Negative	Negative			yes	2	38.3	3	14	0.419	4820000	285000	8320	0.69	5740.8	0.25	2080	0.01	83.2	0.05	416	0	0
H	91	Positive	Negative	Positive	Positive	Negative	DENV1	yes	5	39	5	12.7	0.394	4590000	185000	3030	0.63	1908.9	0.34	1030.2	0.02	60.6	0.01	30.3	0	0
H	92	Negative	Positive	Positive	Negative			yes	7	41	7	12.5	0.388	4530000	78000	3930	0.15	589.5	0.74	2908.2	0.09	353.7	0.02	78.6	0	0		570	557		11	3.9
H	93	Positive	Negative	Negative	Positive	Negative	DENV1	yes	3	39	2	13	0.392	4400000	210000	4220	0.83	3502.6	0.12	506.4	0.04	168.8	0.01	42.2	0	0
H	94	Negative	Negative	Negative	Positive	Negative	DENV1	yes	3		3	11.7	0.35	4720000	410000	3000	0.62	1860	0.3	900	0.07	210	0.01	30	0	0
H	95	Positive	Negative	Negative	Positive		DENV1	yes	4	39	4	13.1	0.401	4390000	188000	3320	0.57	1892.4	0.43	1427.6	0	0	0	0	0	0
H	96	Positive	Negative	Negative	Positive	Negative	DENV1	yes	2	39	2	15.2	0.459	4840000	210000	5510	0.74	4077.4	0.21	1157.1	0.05	275.5	0	0	0	0
H	97	Positive	Positive	Positive	Negative			yes	8	38.5	8	13.1	0.401	4380000	141000	4860	0.45	2187	0.48	2332.8	0.04	194.4	0.02	97.2	0.01	48.6
H	98	Positive	Positive	Negative	Positive	Positive	DENV1	yes	7	38	7	14.1	0.416	4520000	62000	12840	0.7	8988	0.15	1926	0.09	1155.6	0.01	128.4	0	0
H	99	Positive	Negative	Negative	Positive		DENV1	yes	3	40	3	12.5	0.384	4180000	194000	2840	0.55	1562	0.39	1107.6	0.05	142	0	0	0.01	28.4
H	100	Negative	Negative	Negative	Positive	Negative	DENV1	yes	3		3	13.5	0.406	4480000	315000	3830	0.68	2604.4	0.28	1072.4	0.04	153.2	0	0	0	0		18	23
H	101	Positive	Negative	Negative	Positive		DENV1	yes	3		3	15.6	0.463	4940000	158000	5360	0.76	4073.6	0.24	1286.4	0	0	0	0	0	0
H	102	Negative	Negative	Negative	Positive	Positive	DENV1	yes	1		2	14.8	0.45	4990000	228000	4890	0.79	3863.1	0.1	489	0.09	440.1	0.01	48.9	0.01	48.9
H	103	Negative	Negative	Negative	Negative	Negative		yes	2		3	14.5	0.434	4800000	519000	15310	0.9	13779	0.1	1531	0	0	0	0	0	0
H	104	Negative	Negative	Negative	Negative	Negative		yes	4	39	5	14.7	0.446	4940000	210000	10860	0.82	8905.2	0.15	1629	0.01	108.6	0.02	217.2	0	0
H	105	Negative	Positive	Negative	Negative	Positive		yes	2		2	10.9	0.312	3370000	196000	11580	0.82	9495.6	0.18	2084.4	0	0	0	0	0	0		14	22		46
H	106	Negative	Negative	Positive	Negative			yes	5	40	5	15.1	0.445	5140000	74000	9370	0.43	4029.1	0.46	4310.2	0.07	655.9	0.04	374.8	0	0
H	107	Negative	Positive	Negative	Positive	Positive	DENV1	yes	2	39.5	2	12.9	0.387	4600000	210000	5020	0.86	4317.2	0.12	602.4	0.01	50.2	0.01	50.2	0	0
H	108	Negative	Negative	Negative	Negative	Negative		yes	2	39	2	12.8	0.394	4000000	222000	7800	0.55	4290	0.37	2886	0.07	546	0.01	78	0	0
H	109	Positive	Negative	Negative	Positive	Negative	DENV1	yes	2	38	2	12	0.363	3910000	285000	3300	0.69	2277	0.24	792	0.06	198	0.01	33	0	0
H	111	Negative	Negative	Negative	Negative	Negative		yes	8	39.4	8	11.4	0.36	3940000	288000	5500	0.8	4400	0.18	990	0	0	0.02	110	0	0
H	112	Negative	Positive	Negative	Negative	Positive		yes	7	40	7	11.4	0.35	3640000	192000	10400	0.83	8632	0.11	1144	0.05	520	0.01	104	0	0
H	114	Positive	Positive	Positive	Positive	Negative	DENV1	yes	4	40	4	14.9	0.47	4960000	144000	1900	0.56	1064	0.39	741	0.04	76	0.01	19	0	0
H	115	Positive	Positive	Positive	Positive	Negative	DENV1	yes	4	39	4	14.7	0.43	4790000	96000	3600	0.72	2592	0.25	900	0.02	72	0.01	36	0	0
H	116	Negative	Positive	Negative	Negative	Positive		yes	5	39	5	13.9	0.44	4920000	97000	3600	0.38	1368	0.52	1872	0.07	252	0.03	108	0	0
H	117	Positive	Negative	Negative	Positive	Negative	DENV1	yes	2	38.5	2	15.7	0.47	4950000	119000	4200	0.52	2184	0.34	1428	0.13	546	0.01	42	0	0
H	118	Negative	Negative	Negative	Positive	Negative	DENV1	yes	2	37.5	2	14.7	0.44	4960000	188000	3300	0.49	1617	0.35	1155	0.15	495	0.01	33	0	0
H	119	Positive	Negative	Positive	Positive		DENV1	yes	8	40	8	14	0.43	4620000	78000	4400	0.58	2552	0.36	1584	0.04	176	0.02	88	0	0
H	121	Positive	Negative	Negative	Positive		DENV1	yes	6	39	6	15.1	0.44	4920000	92000	1400	0.6	840	0.38	532	0.02	28	0	0	0	0
H	123	Positive	Negative	Negative	Positive		DENV1	yes	2	38.5	2	17.4	0.52	5760000	111000	3200	0.52	1664	0.48	1536	0	0	0	0	0	0
H	124	Negative	Negative	Negative	Negative			yes	1		1	15.5	0.45	4780000	102000	11400	0.9	10260	0.06	684	0.04	456	0	0	0	0
H	125	Positive	Negative	Negative	Positive		DENV1	yes	3	40	3	15.8	0.47	5190000	417000	5500	0.78	4290	0.2	1100	0	0	0.02	110	0	0
H	126	Negative	Negative	Negative	Negative	Positive		yes	5	39	5	12.2	0.37	3930000	302000	5100	0.5	2550	0.43	2193	0.02	102	0.05	255	0	0
H	127	Negative	Negative	Positive	Positive		DENV1	yes	7	39	7	11.2	0.34	2620000	55000	2200	0.2	440	0.78	1716	0	0	0.02	44	0	0		115	159	1.34
H	128	Positive	Negative	Positive	Positive		DENV1	yes	3	40	3	13.3	0.4	3150000	120000	6400	0.82	5248	0.18	1152	0	0	0	0	0	0
H	129	Positive	Negative	Negative	Positive	Negative	DENV1	yes	4	39	4	13.2	0.38	4330000	252000	4100	0.66	2706	0.34	1394	0	0	0	0	0	0
H	130	Negative	Negative	Negative	Negative	Negative		yes	3	40	3	13.2	0.4	4110000	350000	12100	0.84	10164	0.16	1936	0	0	0	0	0	0
H	131	Negative	Negative	Negative	Positive		DENV2	yes	3	39	3	13.9	0.42	4390000	362000	10900	0.51	5559	0.48	5232	0.01	109	0	0	0	0
H	132	Positive	Negative	Negative	Positive		DENV1	yes	3	39	3	15.2	0.44	4600000	184000	4200	0.69	2898	0.28	1176	0.02	84	0.01	42	0	0
H	133	Positive	Positive	Negative	Positive	Indeterminate	DENV1	yes	5	39.4	5	14.7	0.44	5040000	92000	4200	0.75	3150	0.25	1050	0	0	0	0	0	0
H	134	Negative	Positive	Positive	Positive	Negative	DENV1	yes	7	40	7	13.7	0.4	4030000	73000	2600	0.39	1014	0.13	338	0.04	104	0	0	0	0
H	135	Negative	Positive	Negative	Negative	Positive		yes	8	40	8	13	0.39	3920000	149000	7500	0.53	3975	0.37	2775	0.08	600	0.01	75	0.01	75
H	136	Negative	Negative	Negative	Negative			yes	4	38.5	4	14.1	0.42	4260000	293000	4300	0.52	2236	0.31	1333	0.11	473	0.06	258	0	0
H	137	Positive	Negative	Positive	Positive		DENV1	yes	5	39	5	13.7	0.4	4430000	150000	2800	0.49	1372	0.51	1428	0	0	0	0	0	0
H	138	Negative	Positive	Negative	Negative	Negative		yes	4	40	4	15.2	0.45	4330000	228000	8700	0.78	6786	0.31	2697	0	0	0.01	87	0	0
H	139	Positive	Negative	Negative	Positive		DENV1	yes	4	39	4	14.8	0.44	4340000	148000	3500	0.63	2205	0.35	1225	0.01	35	0.01	35	0	0
H	140	Negative	Negative	Negative	Negative			yes	3	39	3	12.4	0.36	3950000	280000	8600	0.81	6966	0.19	1634	0	0	0	0	0	0
H	142	Negative	Positive	Negative	Negative	Positive		yes	3	38	3	15.7	0.45	4920000	377000	10500	0.8	8400	0.2	2100	0	0	0	0	0	0
H	143	Positive	Negative	Negative	Positive	Negative	DENV1	yes	3	38	3	12.6	0.37	4190000	247000	3500	0.77	2695	0.3	1050	0.03	105	0	0	0	0
H	144	Negative	Negative	Negative	Negative	Negative		yes	2	38.6	2	11.7	0.35	3680000	267000	5900	0.6	3540	0.35	2065	0	0	0.05	295	0	0
H	145	Negative	Positive	Negative	Negative	Positive		yes	2	38	2	14.3	0.42	4420000	339000	7100	0.57	4047	0.36	2556	0	0	0.07	497	0	0
H	146	Positive	Negative	Negative	Negative			yes	6	38	5	12.6	0.38	4170000	380000	6400	0.53	3392	0.44	2816	0.03	192	0	0	0	0
H	147	Positive	Negative	Negative	Negative			yes	4	37.9	4	15.8	0.46	5030000	199000	6300	0.58	3654	0.42	2646	0	0	0	0	0	0
H	148	Negative	Negative	Negative	Negative	Negative		yes	5	39	5	12	0.35	3810000	295000	8400	0.66	5544	0.3	2520	0.03	252	0.01	84	0	0
H	149	Positive	Negative	Negative	Positive	Negative	DENV1	yes	2	38	2	13	0.38	4050000	300000	4100	0.81	3321	0.19	779	0	0	0	0	0	0
H	150	Negative	Positive	Negative	Negative	Negative		yes	2	38	1	13.7	0.38	4220000	172000	6200	0.76	4712	0.15	930	0.09	558	0	0	0	0
H	151	Positive	Negative	Negative	Positive	Negative	DENV1	yes	4	39	4	12.9	0.38	3850000	147000	2800	0.66	1848	0.34	952	0	0	0	0	0	0
H	152	Negative	Negative	Negative	Negative	Negative		yes	2	39	3	12	0.34	3840000	291000	16600	0.89	14774	0.11	1826	0	0	0	0	0	0
H	153	Positive	Positive	Positive	Positive	Negative	DENV1	yes	5	39	5	14.5	0.41	4310000	189000	1600	0.58	928	0.37	592	0.04	64	0.01	16	0	0
H	154	Negative	Negative	Negative	Negative	Negative		yes	2	39	2	13.4	0.39	4520000	241000	9900	0.67	6633	0.32	3168	0	0	0.01	99	0	0
H	156	Positive	Positive	Positive	Positive	Positive	DENV1	yes	5	39	5	12.7	0.36	3800000	237000	3600	0.8	2880	0.2	720	0	0	0	0	0	0
H	157	Negative	Negative	Negative	Negative	Negative		yes	3	39	3	17.2	0.46	4940000	212000	3500	0.34	1190	0.65	2275	0	0	0.01	35	0	0
H	159	Negative	Negative	Negative	Positive	Positive	DENV4	yes	3	39	3	15.9	0.43	4670000	239000	3600	0.45	1620	0.52	1872	0.01	36	0.02	72	0	0
H	160	Negative	Positive	Negative	Negative			yes	2	39	2	14.9	0.41	4610000	288000	3800	0.44	1672	0.56	2128	0	0	0	0	0	0
H	161	Negative	Negative	Negative	Negative	Indeterminate		yes	6	38	6	14.3	0.4	4060000	312000	5300	0.72	3816	0.23	1219	0.02	106	0.02	106	0.01	53
H	162	Positive	Negative	Negative	Positive	Positive	DENV1	yes	5	38	4	15.1	0.41	4360000	98000	2600	0.63	1638	0.35	910	0.02	52	0	0	0	0
H	163	Negative	Negative	Negative	Negative	Negative		yes	3	38	3	13.3	0.41	4070000	186000	5200	0.78	4056	0.22	1144	0	0	0	0	0	0
H	164	Positive	Negative	Negative	Positive	Negative	DENV1	yes	4	39	4	15.6	0.48	5100000	234000	4300	0.59	2537	0.41	1763	0	0	0	0	0	0
H	165	Positive	Negative	Negative	Positive	Positive	DENV1	yes	3	41	3	15	0.45	4320000	196000	3700	0.73	2701	0.27	999	0	0	0	0	0	0
H	166	Positive	Negative	Negative	Positive	Negative	DENV1	yes	4	39	4	15.4	0.46	5060000	211000	2100	0.52	1092	0.47	987	0	0	0.01	21	0	0
H	167	Negative	Negative	Negative	Positive	Negative	DENV1	yes	3	39	3	14.8	0.47	4470000	201000	4600	0.71	3266	0.29	1334	0	0	0	0	0	0
H	168	Negative	Negative	Positive	Negative			yes	2		2	13.3	0.42	4190000	274000	16600	0.92	15272	0.08	1328	0	0	0	0	0	0		12	11
H	169	Negative	Positive	Negative	Positive	Positive	DENV1	yes	5	39	5	19.3	0.58	5880000	29000	3100	0.31	961	0.59	1829	0.08	248	0.02	62	0	0
H	170	Negative	Positive	Negative	Negative	Positive		yes	5		5	16.8	0.5	5850000	223000	5200	0.35	1820	0.58	3016	0.07	364	0	0	0	0
H	171	Negative	Positive	Negative	Positive	Negative	DENV1	yes	2	39	2	12.8	0.39	4380000	152000	1800	0.64	1152	0.36	648	0	0	0	0	0	0
H	172	Negative	Negative	Negative	Negative			yes	6	39	6	14.7	0.45	5020000	201000	6600	0.58	3828	0.41	2706	0	0	0.01	66	0	0
H	173	Negative	Negative	Negative	Negative	Negative		yes	2	39	2	14.9	0.44	4490000	290000	9400	0.7	6580	0.2	1880	0.04	376	0.06	564	0	0
H	174	Positive	Negative	Positive	Positive		DENV1	yes	6	39	6	15.1	0.45	4800000	146000	7100	0.41	2911	0.59	4189	0	0	0	0	0	0
H	175	Negative	Positive	Positive	Positive	Positive	DENV2	yes	6	40	6	14.3	0.43	4970000	130000	4100	0.3	1230	0.69	2829	0	0	0.01	41	0	0
H	176	Negative	Negative	Negative	Positive	Negative	DENV4	yes	4	38	4	13.5	0.39	4330000	289000	4900	0.69	3381	0.29	1421	0.02	98	0	0	0	0
H	177	Positive	Negative	Positive	Positive	Negative	DENV1	yes	5	38	5	13.1	0.4	4240000	243000	3100	0.72	2232	0.28	868	0	0	0	0	0	0
H	178	Positive	Positive	Negative	Positive	Negative	DENV4	yes	3	39	3	14.7	0.44	5010000	207000	3700	0.41	1517	0.59	2183	0	0	0	0	0	0
H	180	Positive	Negative	Negative	Positive	Negative	DENV1	yes	5	40	4	13.5	0.4	4460000	178000	3200	0.74	2368	0.26	832	0	0	0	0	0	0
H	181	Positive	Negative	Negative	Positive		DENV1	yes	6	40	6	14.6	0.43	4700000	117000	3100	0.44	1364	0.53	1643	0	0	0.03	93	0	0
H	182	Positive	Negative	Positive	Positive		DENV1	yes	6	38	6	14.8	0.44	4670000	95000	1800	0.24	432	0.76	1368	0	0	0	0	0	0
H	183	Positive	Negative	Negative	Positive		DENV1	yes	2	38	3	16.5	0.48	5710000	180000	3700	0.62	2294	0.37	1369	0.01	37	0	0	0	0
H	184	Positive	Negative	Positive	Positive		DENV1	yes	7	39	7	16.1	0.48	5170000	147000	5100	0.5	2550	0.46	2346	0.02	102	0.02	102	0	0
H	185	Negative	Positive	Negative	Negative	Positive		yes	4	40	4	16.3	0.48	5310000	300000	10700	0.77	8239	0.21	2247	0.01	107	0.01	107	0	0
H	186	Negative	Negative	Negative	Negative	Negative		yes	2	38	2	13.7	0.42	4560000	346000	20500	0.93	19065	0.07	1435	0	0	0	0	0	0
H	187	Negative	Positive	Negative	Negative	Negative		yes	2	40	2	10.1	0.32	4400000	230000	5400	0.53	2862	0.42	2268	0	0	0.05	270	0	0
H	188	Negative	Negative	Negative	Negative			yes	3	39	3	15.2	0.46	5110000	344000	9900	0.82	8118	0.11	1089	0.01	99	0.06	594	0	0
X	1	Negative	Positive	Negative	Negative	Negative		no	3		3		0.41		180000	6100											Positive
X	2	Positive	Negative	Positive	Positive		DENV1	yes	6	39.5	6	15.4	0.495	5410000	147000	3900	0.62	2418	0.31	1209	0.06	234	0.01	39	0	0
X	3	Positive	Negative	Negative	Positive		DENV1	yes	2		2	11.4	0.394	4580000	196000	3400	0.71	2414	0.25	850	0.01	34	0.03	102	0	0
X	6	Negative	Positive	Positive	Negative			yes	7	38.5	6	14.9	0.45	5000000	113000	3600	0.28	1008	0.63	2268	0.09	324	0	0	0	0		213	265
X	8	Positive	Negative	Negative	Positive		DENV1	yes	3	39	3	17.3	0.487	6120000	152000	3340	0.58	1937.2	0.29	968.6	0.12	400.8	0.01	33.4	0	0
X	9	Negative	Negative	Negative	Negative	Negative		yes	3	38.3	2	13.6	0.408	4870000	208000	6890	0.71	4891.9	0.2	1378	0.08	551.2	0.01	68.9	0	0	Positive
X	12	Positive	Negative	Negative	Positive		DENV1	yes	3	40	2	12.4	0.37	4072000	126000	3900	0.82	3198	0.17	663	0	0	0.01	39	0	0
X	13	Positive	Negative	Negative	Positive		DENV1	yes	3	38.8	3	12.5	0.398	4360000	130000	2800	0.65	1820	0.31	868	0.02	56	0.01	28	0	0
X	19	Negative	Positive	Negative	Negative	Negative		yes	2	38.9	3	12.8	0.408	4830000	303000	8400	0.74	6216	0.23	1932	0.02	168	0.01	84	0	0
X	20	Negative	Negative	Negative	Negative	Negative		no	2		2	14.4	0.476	4830000	358000	7600	0.64	4864	0.33	2508	0.02	152	0.01	76	0	0
X	22	Negative	Negative	Negative	Negative			yes	3	38.6	2	9.8	0.295	3970000	339000	12400	0.62	7688	0.33	4092	0.05	620	0	0	0	0
X	23	Negative	Negative	Negative	Positive		DENV1	yes	3	37.6	3	12.6	0.38	4360000	249000	5020	0.79	3965.8	0.19	953.8	0.02	100.4	0.01	50.2	0	0		27	28	0.31
X	24	Negative	Negative	Negative	Negative	Negative		yes	4	37.5	5	14.5	0.45	5070000	174000	8400	0.6	5040	0.32	2688	0.01	84	0.07	588	0	0
X	25	Negative	Positive	Negative	Negative	Negative		yes	5		5	13.8	0.42	4620000	136000	3700	0.47	1739	0.48	1776	0.04	148	0.01	37	0	0
X	26	Positive	Positive	Positive	Positive	Negative	DENV1	yes	4	38.5	3	13.6	0.382	5110000	160000	4920	0.35	1722	0.62	3050.4	0.03	147.6	0	0	0	0
X	27	Positive	Positive	Negative	Positive	Negative	DENV1	yes	3		4	14	0.443	5140000	152000	6100	0.52	3172	0.44	2684	0.04	244	0	0	0	0
X	29	Positive	Positive	Positive	Positive	Negative	DENV1	yes	3		3	14	0.41	4850000	250000	4200	0.4	1680	0.57	2394	0.02	84	0.01	42	0	0	Positive	29	42
X	33	Negative	Negative	Negative	Negative			yes	5	39	5	12.3	0.373	4280000	580000	11200	0.68	7616	0.28	3136	0.03	336	0.01	112	0	0
X	34	Negative	Positive	Positive	Negative			yes	6	38	6	12.9	0.393	4070000	274000	4500	0.54	2430	0.43	1935	0.02	90	0.01	45	0.09	405
X	36	Negative	Negative	Negative	Negative	Positive		yes	3		3	13.2	0.406	4440000	212000	6200	0.64	3968	0.31	1922	0.05	310	0	0	0	0
X	37	Positive	Negative	Negative	Positive		DENV1	yes	2	39.5	2	14.2	0.45	4490000	166000	5300	0.65	3445	0.3	1590	0.03	159	0.02	106	0	0
X	40	Positive	Negative	Negative	Positive		DENV1	yes	3	39	3	12.9	0.42	4280000	162000	4110	0.68	2794.8	0.28	1150.8	0.03	123.3	0.01	41.1	0	0
X	42	Negative	Negative	Negative	Negative	Positive		yes	2		2	12.4	0.401	4820000	244000	8100	0.57	4617	0.36	2916	0.02	162	0.05	405	0	0
X	43	Positive	Positive	Positive	Negative			yes	7		7	10.9	0.353	4020000	192000	3400	0.46	1564	0.51	1734	0.03	102	0	0	0	0
X	44	Positive	Positive	Positive	Negative	Negative		yes	7		8	11.2	0.344	4580000	117000	4510	0.34	1533.4	0.59	2660.9	0.06	270.6	0.01	45.1	0	0
X	45	Positive	Negative	Negative	Positive		DENV1	yes	3		3	13.1	0.411	4280000	116000	2400	0.61	1464	0.31	744	0.03	72	0.01	24	0	0
X	49	Negative	Negative	Negative	Negative	Negative		yes	4	39	4	12.1	0.38	4691000	135000	2453	0.6	1471.8	0.37	907.61	0	0	0.03	73.59	0	0
X	51	Negative	Negative	Negative	Negative	Negative		yes	3	42	3	12.3	0.37	4130000	137000	6100	0.85	5185	0.1	610	0.04	244	0.01	61	0	0
